# Supplementary material for: Synthesis and properties of [PCP] pincer silylene cobalt(i) complexes
Source: Royal Society of Chemistry journal article supplement (doi:10.1039/d1nj02982g), 2021-01-01
Supplement: d1nj02982g1.pdf [file d1nj02982g1.pdf]

## Supporting Information to the *New Journal of Chemistry*

### Synthesis and property of [PCP] pincer silyene cobalt(I) complexes

Yonghui Li,<sup>a</sup> Qingqing Fan,<sup>a</sup> Haiquan Yang,<sup>a</sup> Shangqing Xie,<sup>a</sup> Wei Huang,<sup>a</sup> Xiaoyan Li,<sup>a</sup> Hongjian Sun<sup>\*a</sup>, Olaf Fuhr,<sup>b</sup> and Dieter Fenske<sup>b</sup>

<sup>a</sup>*School of Chemistry and Chemical Engineering, Key Laboratory of Special Functional Aggregated Materials, Ministry of Education, Shandong University, Shanda Nanlu 27, 250100 Jinan, People's Republic of China*

<sup>b</sup>*Institut für Nanotechnologie (INT) und Karlsruher Nano-Micro-Facility (KNMF), Karlsruher Institut für Technologie (KIT), Hermann-von-Helmholtz-Platz 1, 76344 Eggenstein-Leopoldshafen, Germany*

Correspondence author: [hjsun@sdu.edu.cn](mailto:hjsun@sdu.edu.cn)

### Contents

|                                                                                   |     |
|-----------------------------------------------------------------------------------|-----|
| 1. Crystallographic Data of complexes <b>2</b> , <b>3</b> , <b>4</b> and <b>6</b> | S2  |
| 2. IR and NMR spectra of ligand <b>L2</b>                                         | S4  |
| 3. IR and NMR spectra of complexes <b>2</b> , <b>3</b> , <b>4</b> and <b>6</b>    | S6  |
| 4. <sup>1</sup> H and <sup>13</sup> C NMR spectra of the catalytic products       | S15 |

1. Crystallographic Data of complexes **2**, **3**, **4** and **6**

Table 1. Crystallographic Data for Complexes **2** and **3**

|                                   | <b>2</b>                                                                            | <b>3</b>                                                                            |
|-----------------------------------|-------------------------------------------------------------------------------------|-------------------------------------------------------------------------------------|
| formula                           | C <sub>45</sub> H <sub>57</sub> ClCoN <sub>2</sub> O <sub>2</sub> P <sub>3</sub> Si | C <sub>46</sub> H <sub>59</sub> ClCoN <sub>2</sub> O <sub>2</sub> P <sub>3</sub> Si |
| M                                 | 873.30                                                                              | 887.33                                                                              |
| crystal system                    | monoclinic                                                                          | orthorhombic                                                                        |
| space group                       | P2 <sub>1</sub> /n                                                                  | Pbca                                                                                |
| a/Å                               | 10.1744(3)                                                                          | 13.6916(5)                                                                          |
| b/Å                               | 9.3902(2)                                                                           | 13.9509(8)                                                                          |
| c/Å                               | 46.7097(14)                                                                         | 47.3618(11)                                                                         |
| α/°                               | 90                                                                                  | 90                                                                                  |
| β/°                               | 94.478(2)                                                                           | 90                                                                                  |
| γ/°                               | 90                                                                                  | 90                                                                                  |
| V [Å <sup>3</sup> ]               | 4449.0(2)                                                                           | 9046.6(6)                                                                           |
| Z                                 | 4                                                                                   | 8                                                                                   |
| M [mm <sup>-1</sup> ]             | 3.468                                                                               | 3.416                                                                               |
| F(000)                            | 1840.0                                                                              | 3744.0                                                                              |
| 2θ range for data collection/°    | 7.634 to 124.998                                                                    | 6.488 to 125.134                                                                    |
| reflections collected             | 25053                                                                               | 31022                                                                               |
| independent reflections           | 10346 [R <sub>int</sub> = 0.0350, R <sub>sigma</sub> = 0.0366]                      | 10660 [R <sub>int</sub> = 0.0264, R <sub>sigma</sub> = 0.0263]                      |
| indep. refl. with I ≥ 2σ (I)      | 8106                                                                                | 8488                                                                                |
| data/restraints/parameters        | 10346/0/505                                                                         | 10660/0/515                                                                         |
| goodness-of-fit on F <sup>2</sup> | 1.081                                                                               | 1.050                                                                               |
| final R indexes [I ≥ 2σ (I)]      | R <sub>1</sub> = 0.0620, wR <sub>2</sub> = 0.1557                                   | R <sub>1</sub> = 0.0364, wR <sub>2</sub> = 0.0963                                   |
| final R indexes [all data]        | R <sub>1</sub> = 0.0792, wR <sub>2</sub> = 0.1649                                   | R <sub>1</sub> = 0.0488, wR <sub>2</sub> = 0.1016                                   |

Table 2. Crystallographic Data for Complexes **4** and **6**

|                                        | <b>4</b>                                                                            | <b>6</b>                                                         |
|----------------------------------------|-------------------------------------------------------------------------------------|------------------------------------------------------------------|
| formula                                | C <sub>43</sub> H <sub>48</sub> ClCoN <sub>2</sub> O <sub>3</sub> P <sub>2</sub> Si | C <sub>30</sub> H <sub>34</sub> CoIO <sub>2</sub> P <sub>3</sub> |
| M                                      | 825.24                                                                              | 705.31                                                           |
| crystal system                         | monoclinic                                                                          | orthorhombic                                                     |
| space group                            | P21/c                                                                               | Pbca                                                             |
| a/Å                                    | 16.7134(2)                                                                          | 21.4260(11)                                                      |
| b/Å                                    | 12.4172(2)                                                                          | 15.1726(7)                                                       |
| c/Å                                    | 22.7388(3)                                                                          | 18.2179(8)                                                       |
| $\alpha$ /°                            | 90                                                                                  | 90                                                               |
| $\beta$ /°                             | 90.7763(13)                                                                         | 90                                                               |
| $\gamma$ /°                            | 90                                                                                  | 90                                                               |
| V [Å <sup>3</sup> ]                    | 4718.64(13)                                                                         | 5922.4(5)                                                        |
| Z                                      | 4                                                                                   | 8                                                                |
| M [mm <sup>-1</sup> ]                  | 4.561                                                                               | 9.750                                                            |
| F(000)                                 | 1826.0                                                                              | 2840.0                                                           |
| 2 $\theta$ range for data collection/° | 5.288 to 152.902                                                                    | 7.51 to 115.172                                                  |
| Index ranges                           | -21 ≤ h ≤ 21, -15 ≤ k ≤ 14, -23 ≤ l ≤ 28                                            | -26 ≤ h ≤ 26, -8 ≤ k ≤ 19, -22 ≤ l ≤ 19                          |
| Reflections collected                  | 26561                                                                               | 30142                                                            |
| Independent reflections                | 9309 [R <sub>int</sub> = 0.0426, R <sub>sigma</sub> = 0.0460]                       | 6138 [R <sub>int</sub> = 0.0719, R <sub>sigma</sub> = 0.0502]    |
| Data/restraints/parameters             | 9309/0/531                                                                          | 6138/0/337                                                       |
| Goodness-of-fit on F <sup>2</sup>      | 1.060                                                                               | 0.916                                                            |
| Final R indexes [I ≥ 2 $\sigma$ (I)]   | R <sub>1</sub> = 0.0600, wR <sub>2</sub> = 0.1731                                   | R <sub>1</sub> = 0.0344, wR <sub>2</sub> = 0.0740                |
| Final R indexes [all data]             | R <sub>1</sub> = 0.0808, wR <sub>2</sub> = 0.2176                                   | R <sub>1</sub> = 0.0618, wR <sub>2</sub> = 0.0793                |

1. IR and NMR spectra of ligand L2

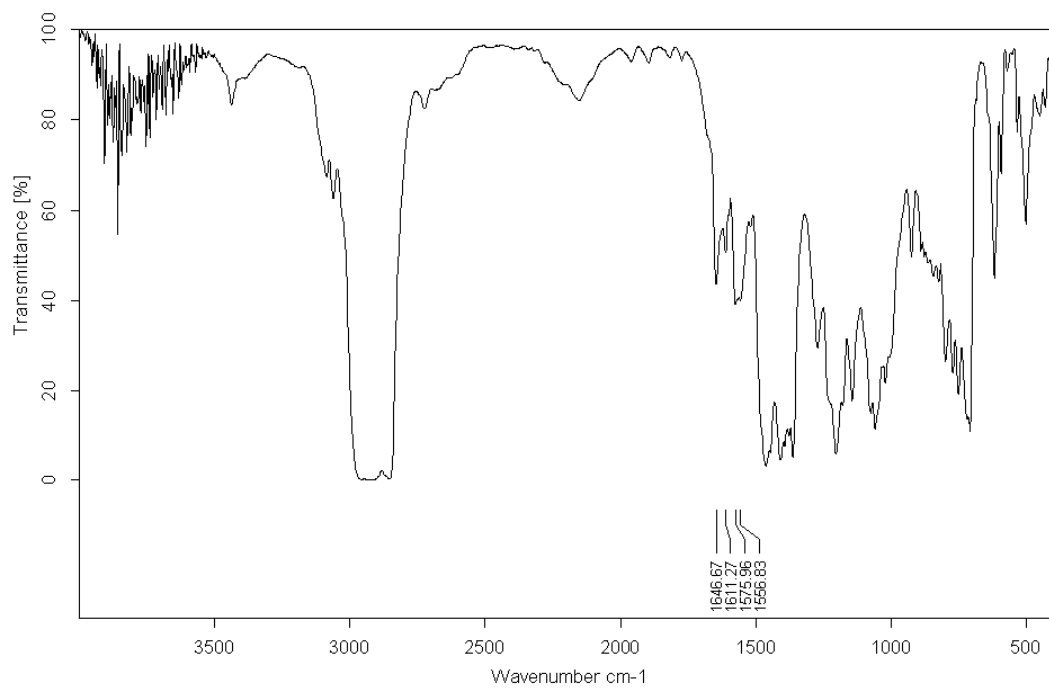

Figure S1. IR of L2

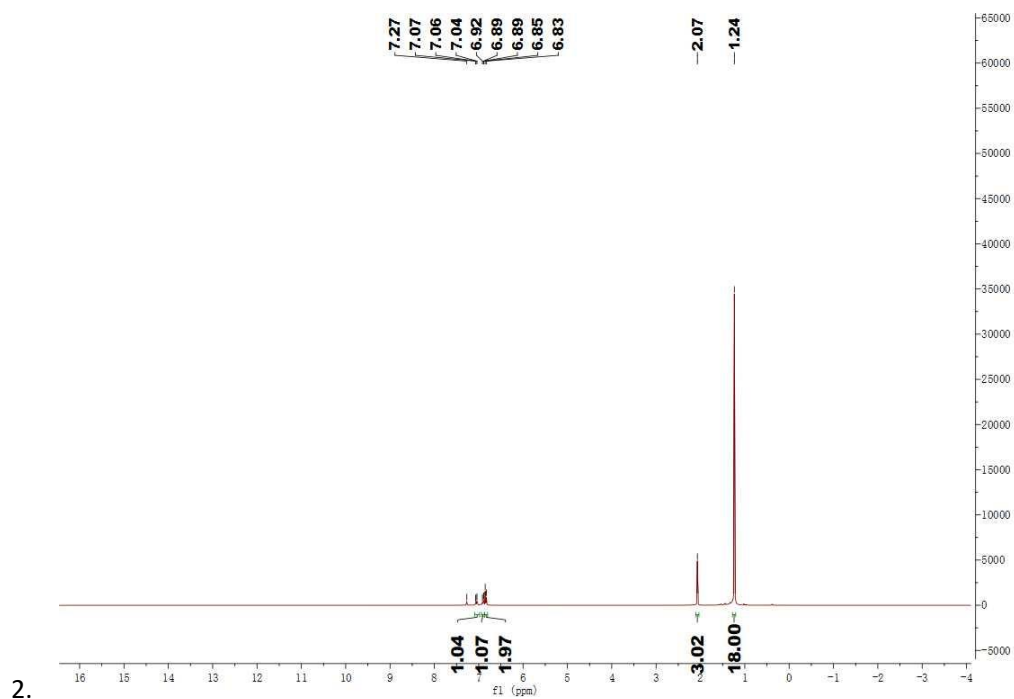

Figure S2. <sup>1</sup>H NMR of L2 in C<sub>6</sub>D<sub>6</sub>

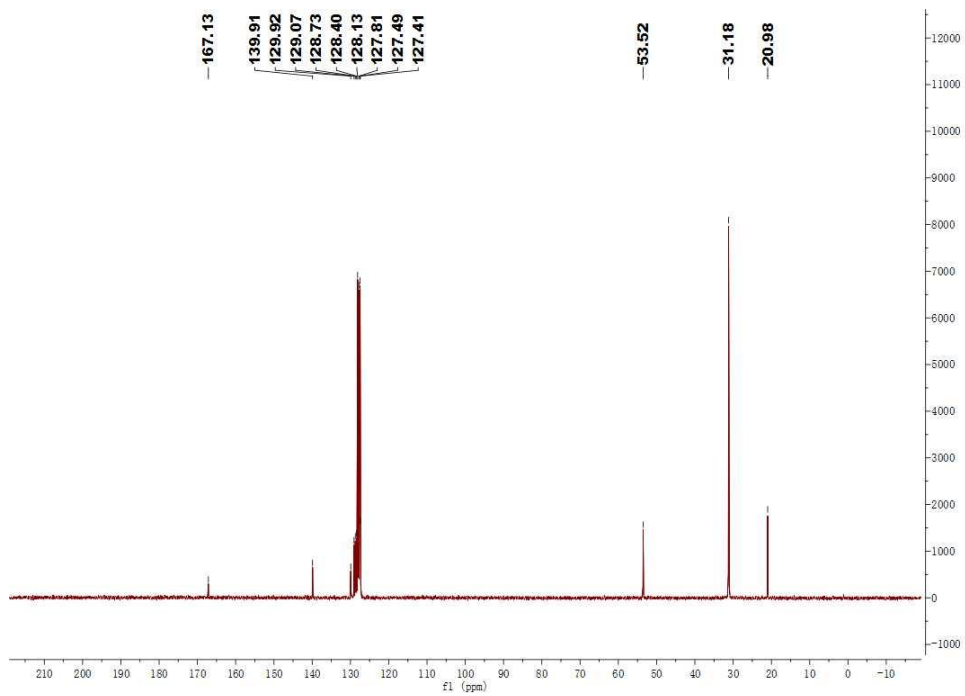

**Figure S3.**  $^{13}\text{C}$  NMR of **L2** in  $\text{C}_6\text{D}_6$

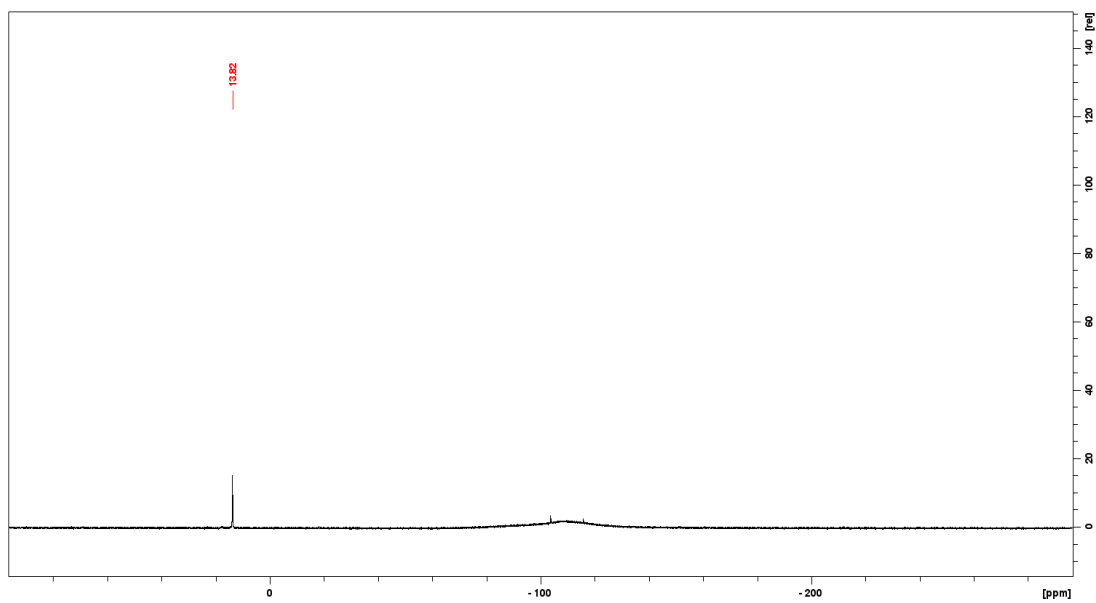

**Figure S4.**  $^{29}\text{Si}$  NMR of **L2** in  $\text{C}_6\text{D}_6$

### 3. IR and NMR spectra of complexes 2, 3, 4 and 6

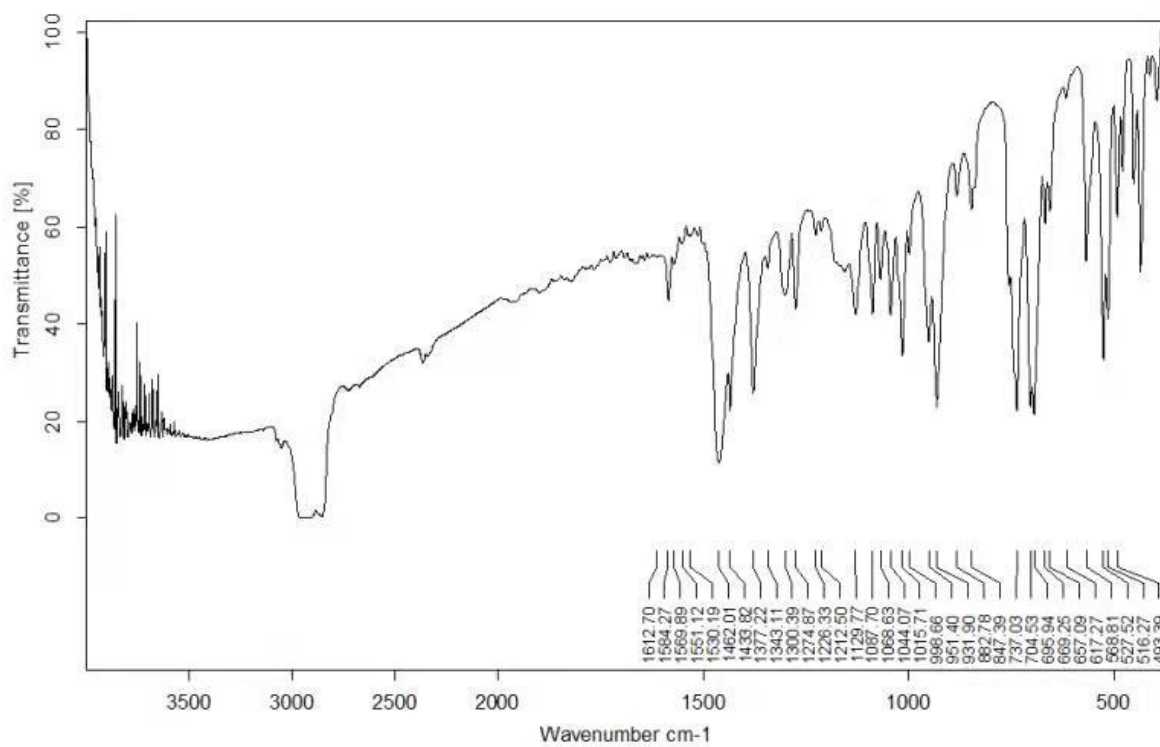

Figure S5. IR of 2

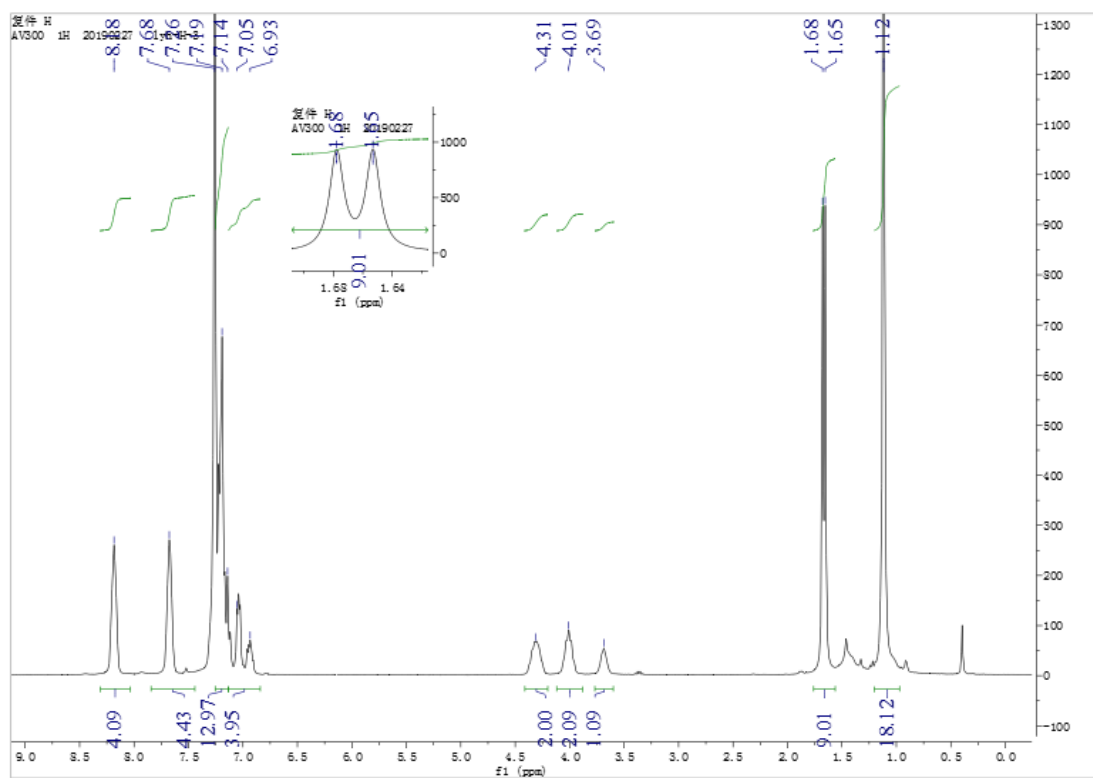

Figure S6. <sup>1</sup>H NMR of 2 in C<sub>6</sub>D<sub>6</sub>

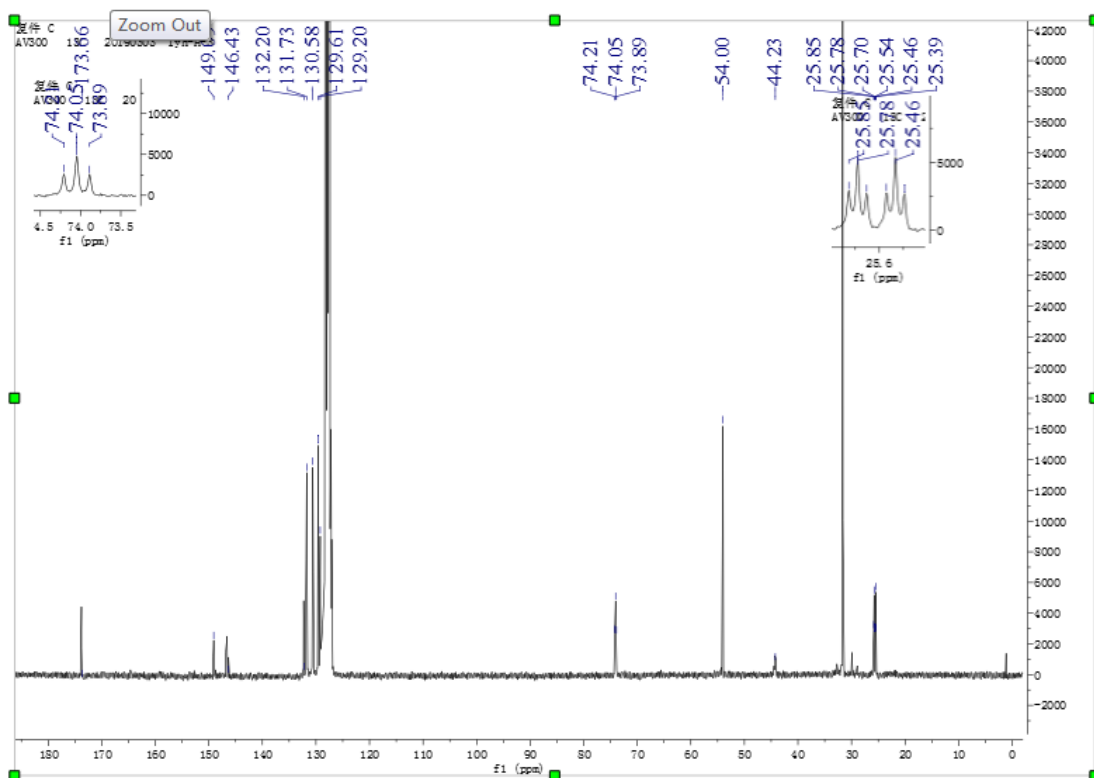

Figure S7.  $^{13}\text{C}$  NMR of **2** in  $\text{C}_6\text{D}_6$

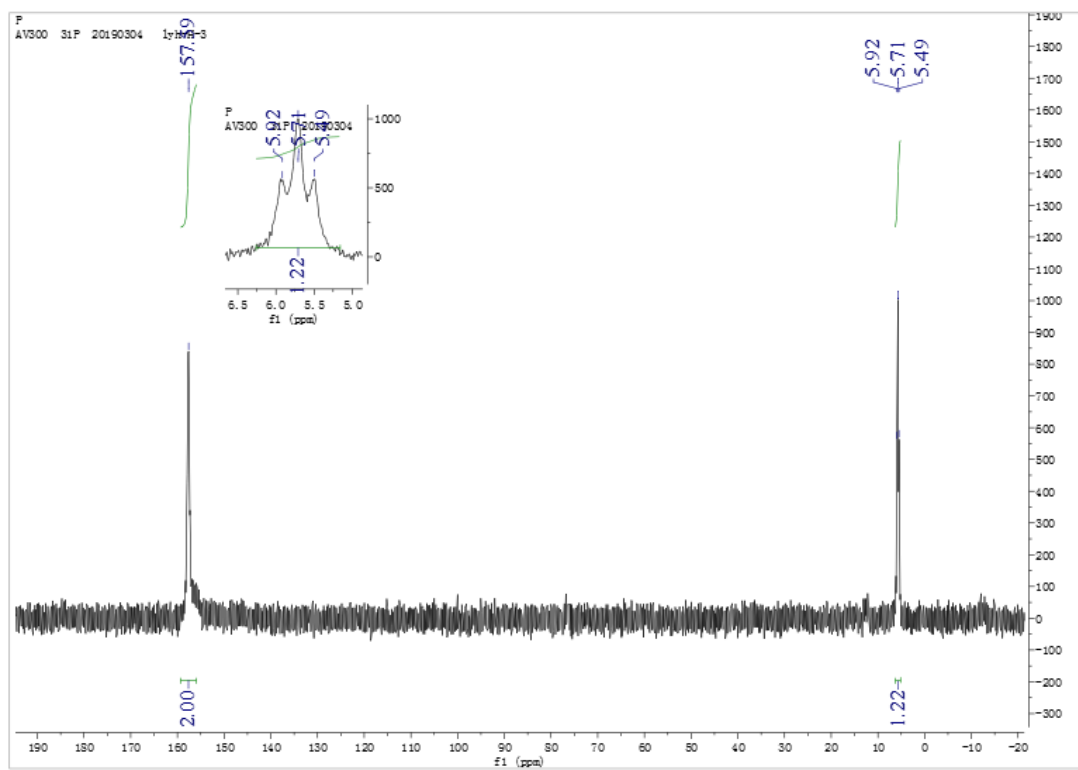

Figure S8.  $^{31}\text{P}$  NMR of **2** in  $\text{C}_6\text{D}_6$

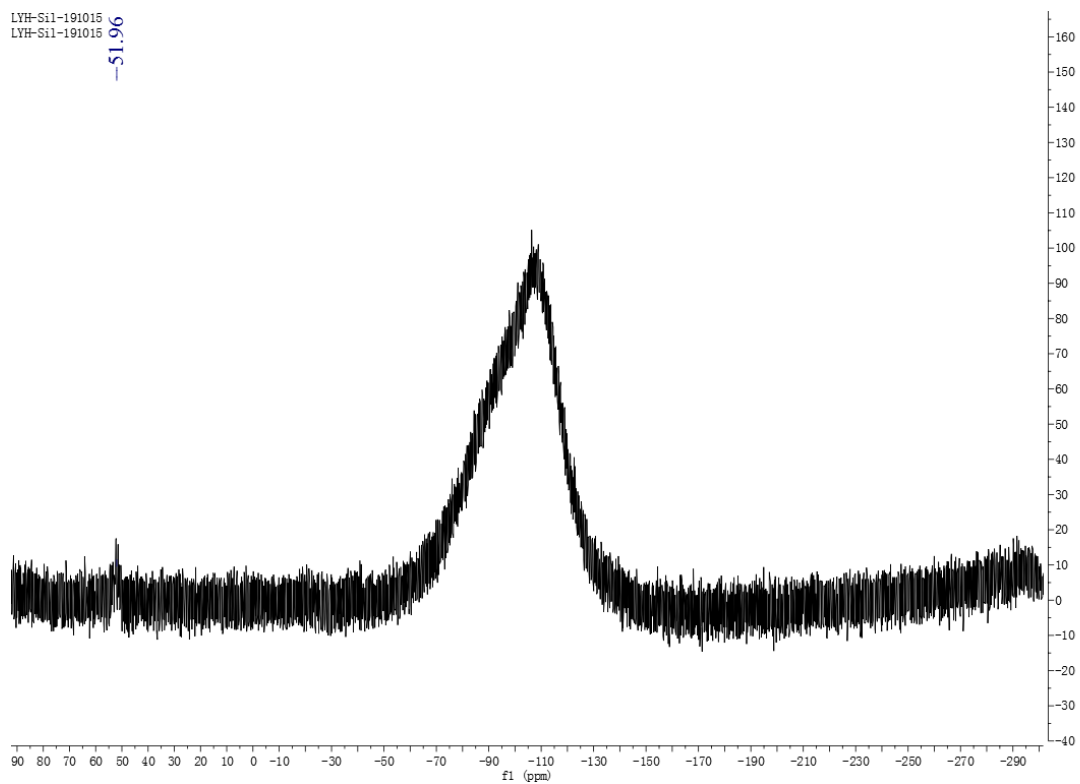

**Figure S9.**  $^{29}\text{Si}$  NMR of **2** in  $\text{C}_6\text{D}_6$

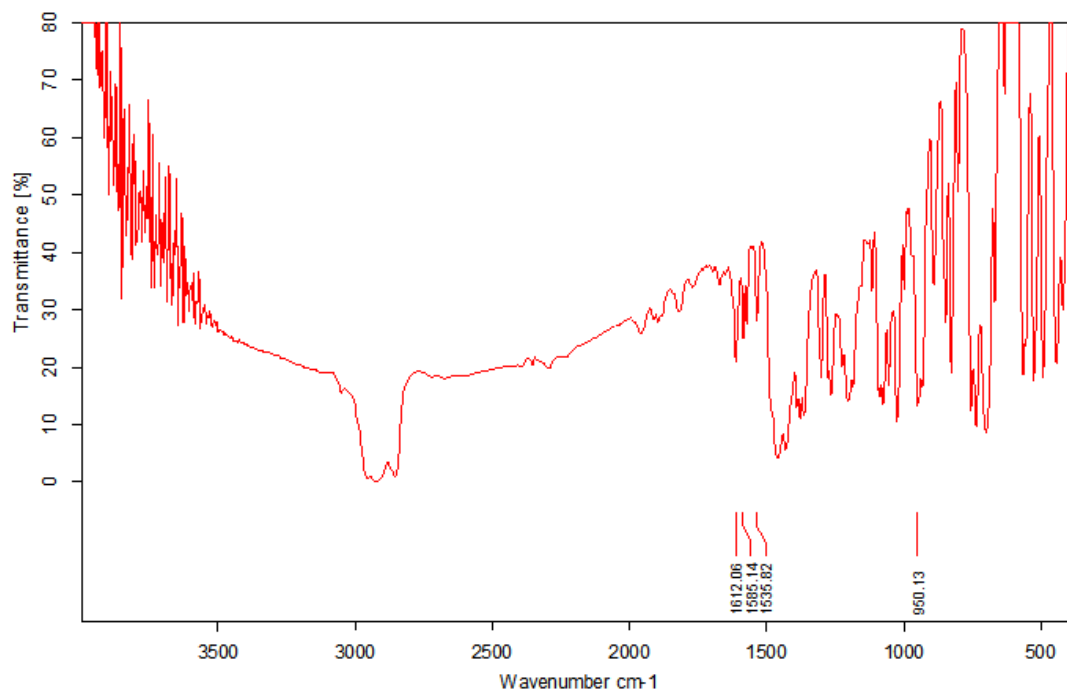

**Figure S10.** IR of **3**



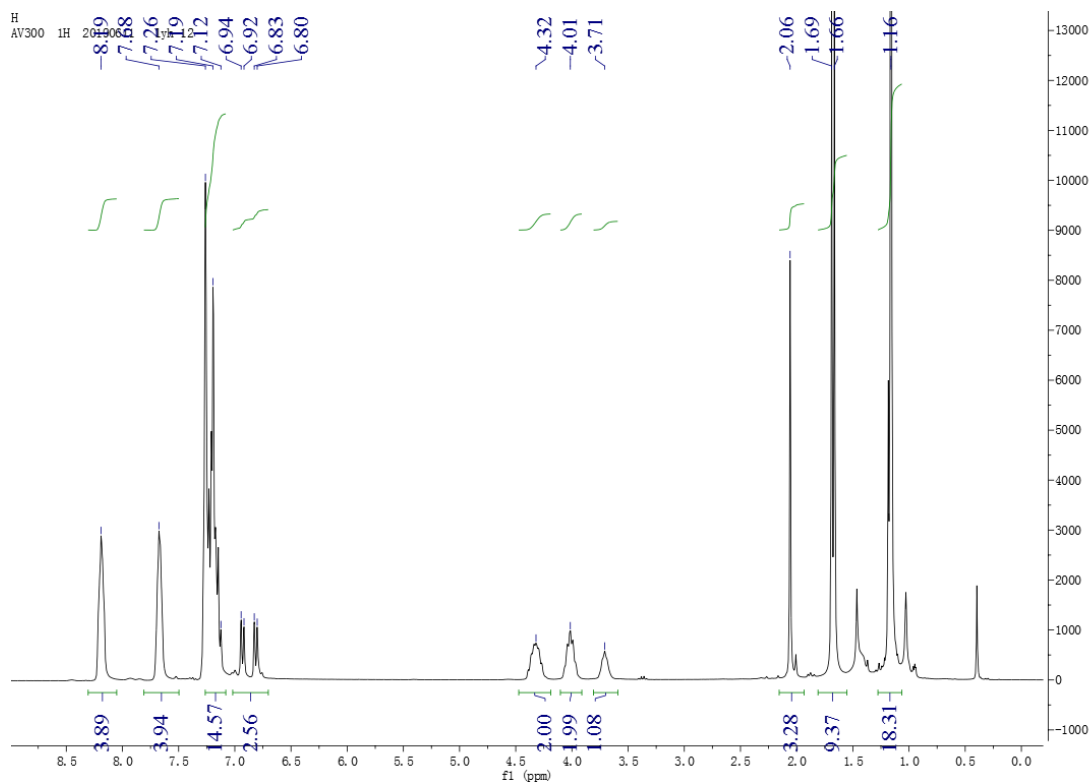

**Figure S11. <sup>1</sup>H NMR of 3 in C<sub>6</sub>D<sub>6</sub>**

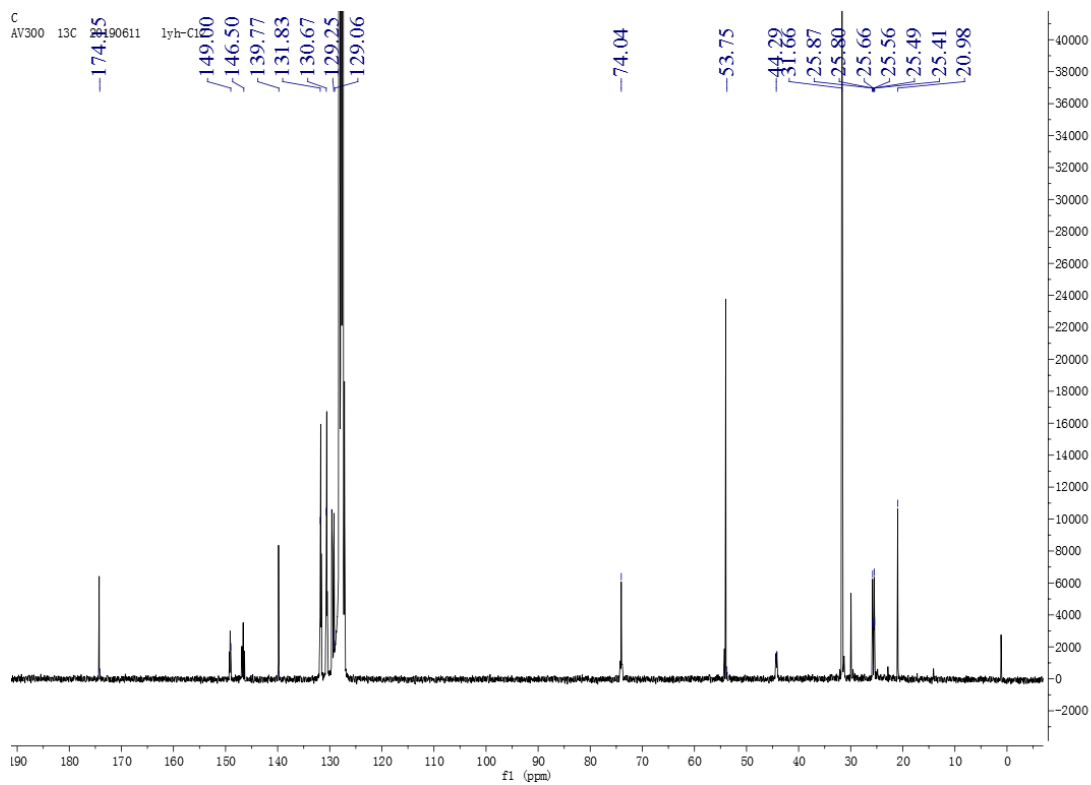

**Figure S12. <sup>13</sup>C NMR of 3 in C<sub>6</sub>D<sub>6</sub>**

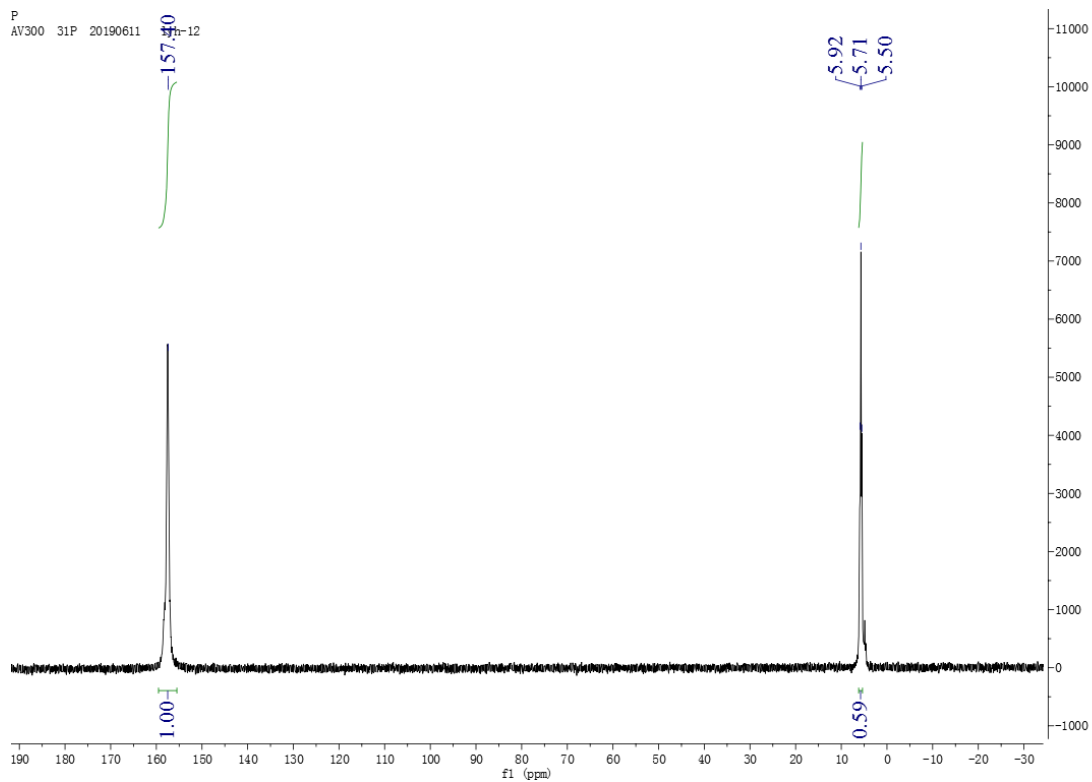

**Figure S13.**  $^{31}\text{P}$  NMR of **3** in  $\text{C}_6\text{D}_6$

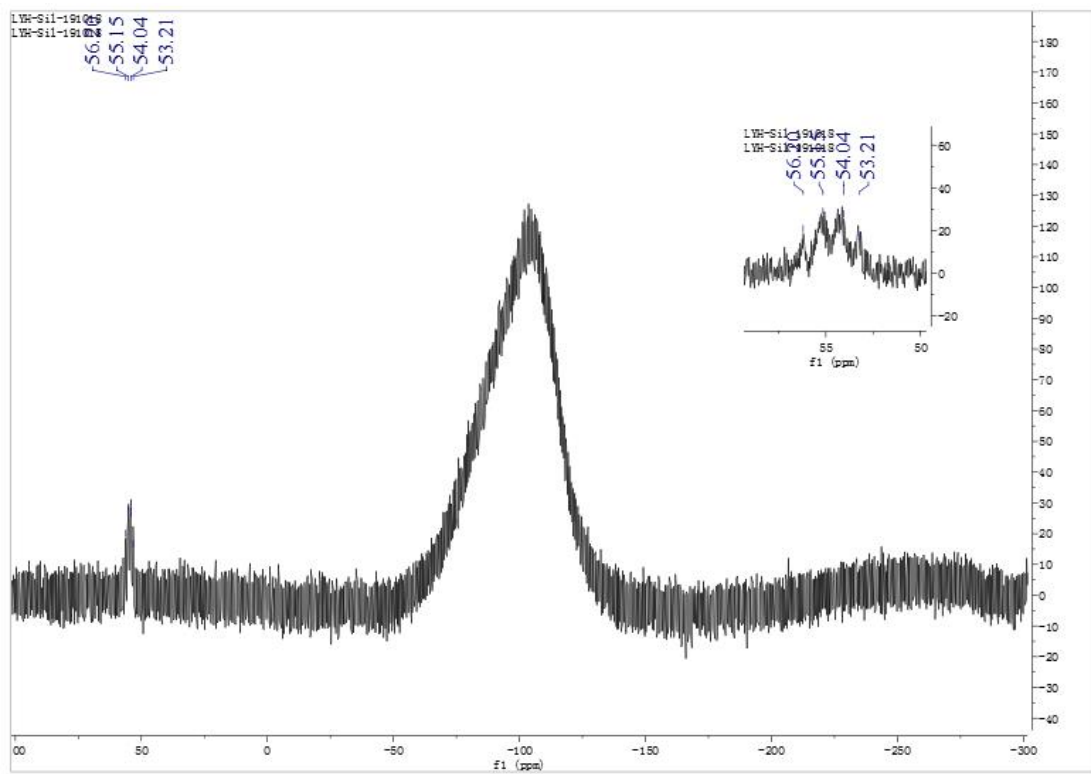

**Figure S14.**  $^{29}\text{Si}$  NMR of **3** in  $\text{C}_6\text{D}_6$

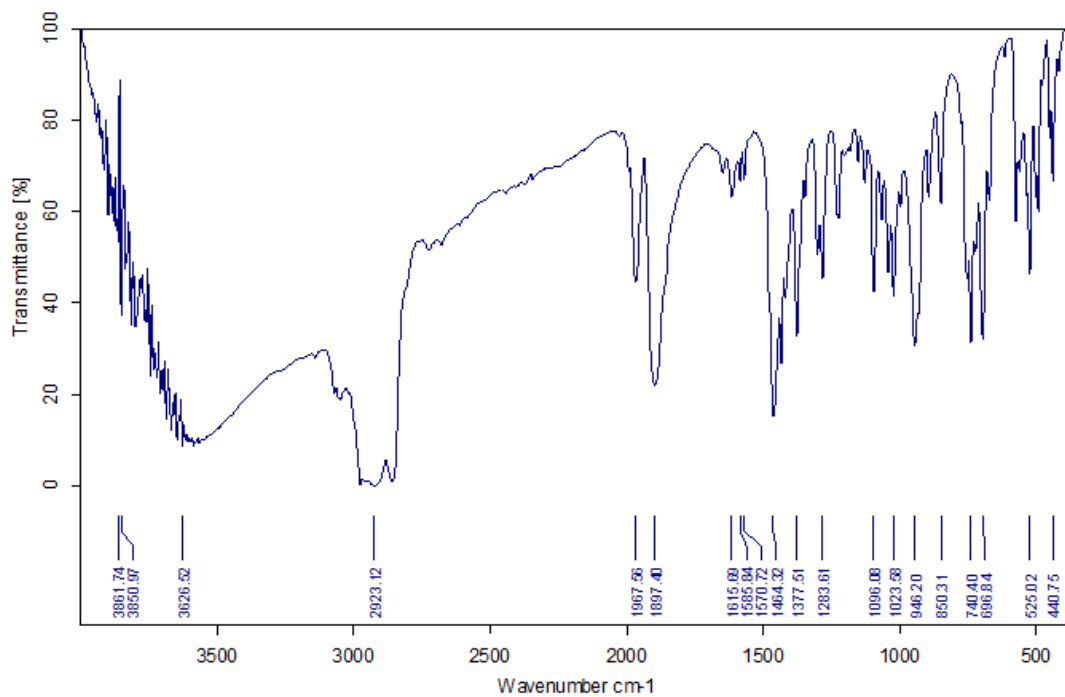

Figure S15. IR of 4

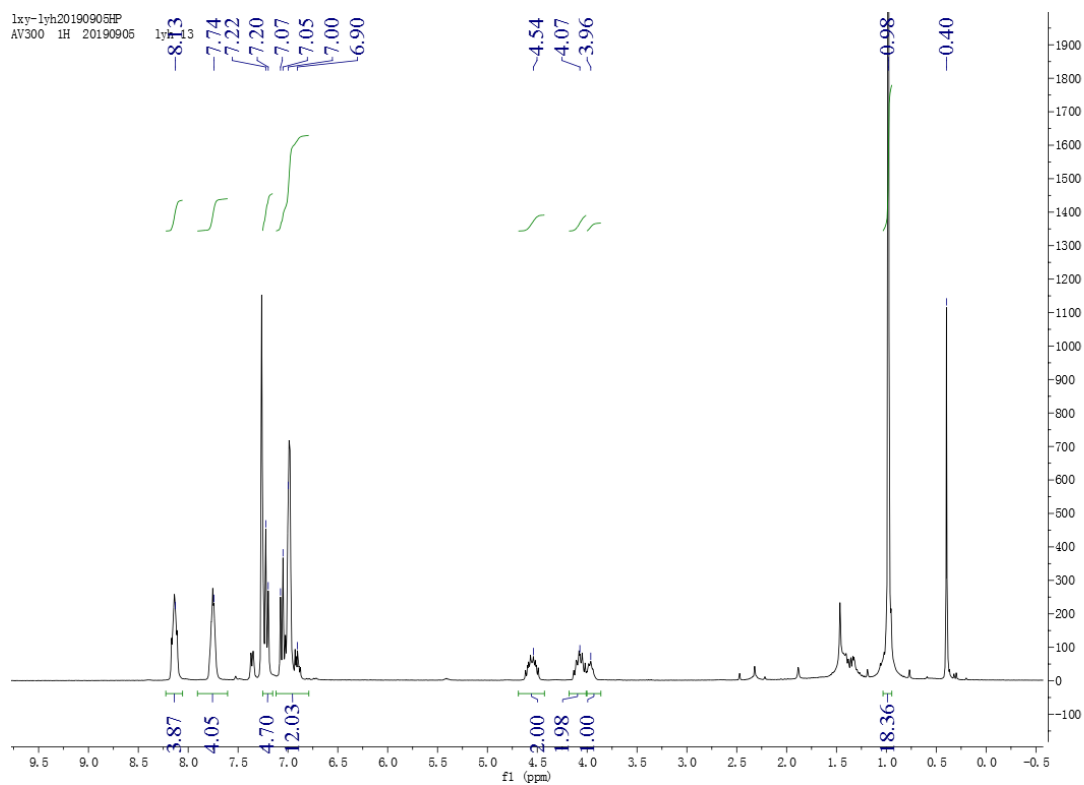

Figure S16.  $^1\text{H}$  NMR of 4 in  $\text{C}_6\text{D}_6$

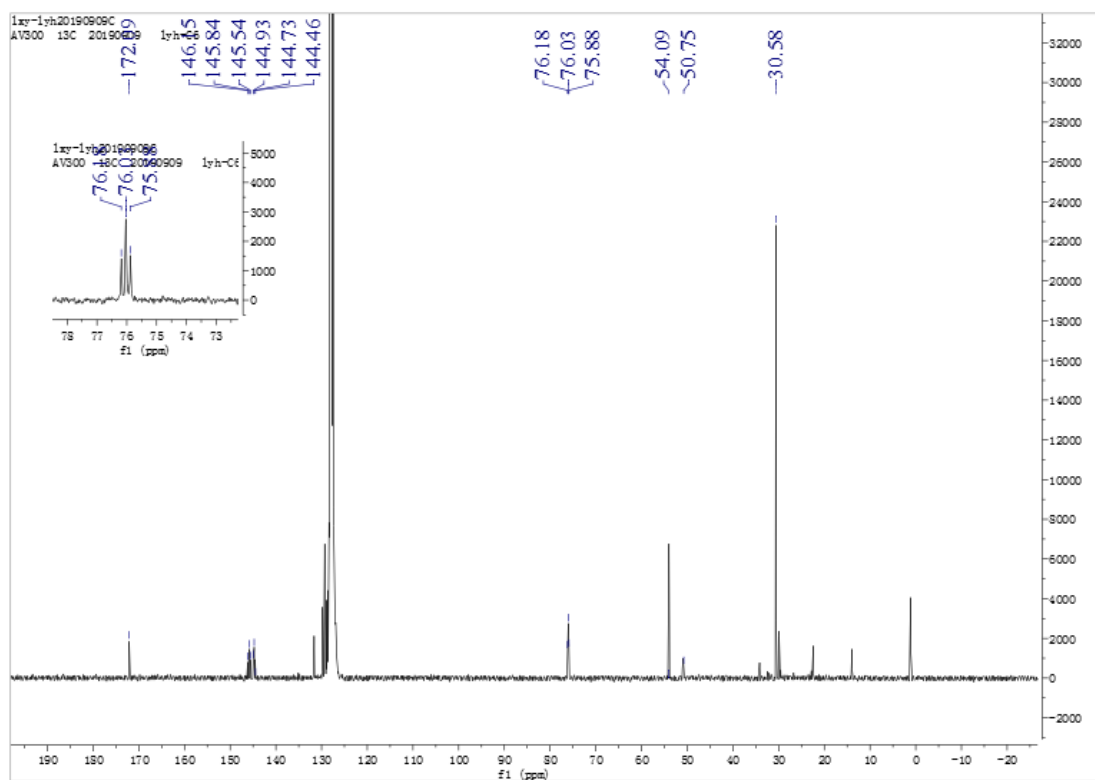

Figure S17.  $^{13}\text{C}$  NMR of 4 in  $\text{C}_6\text{D}_6$

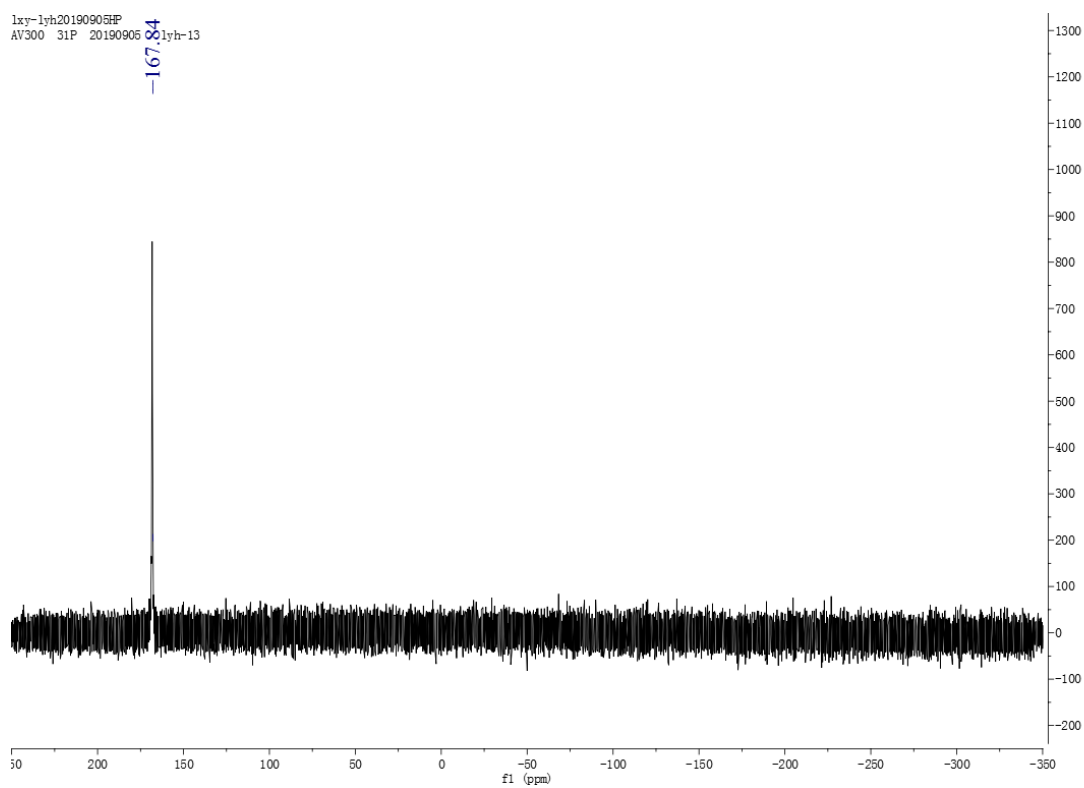

Figure S18.  $^{31}\text{P}$  NMR of 4 in  $\text{C}_6\text{D}_6$

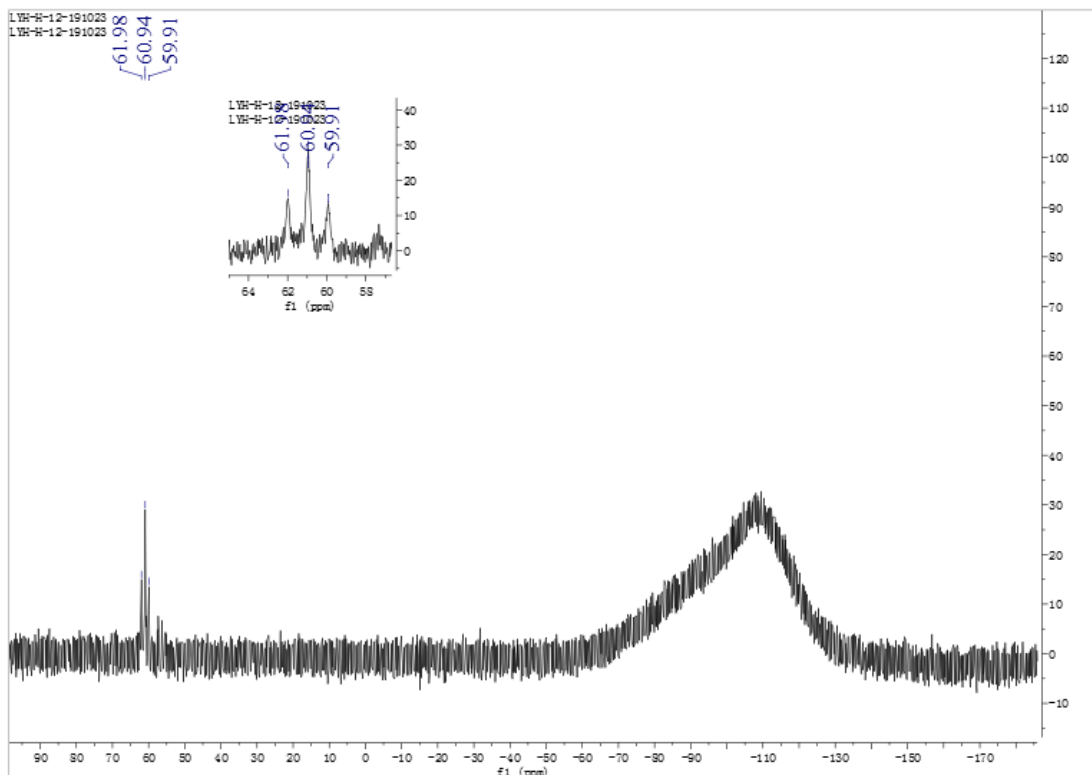

**Figure S19.**  $^{29}\text{Si}$  NMR of 4 in  $\text{C}_6\text{D}_6$

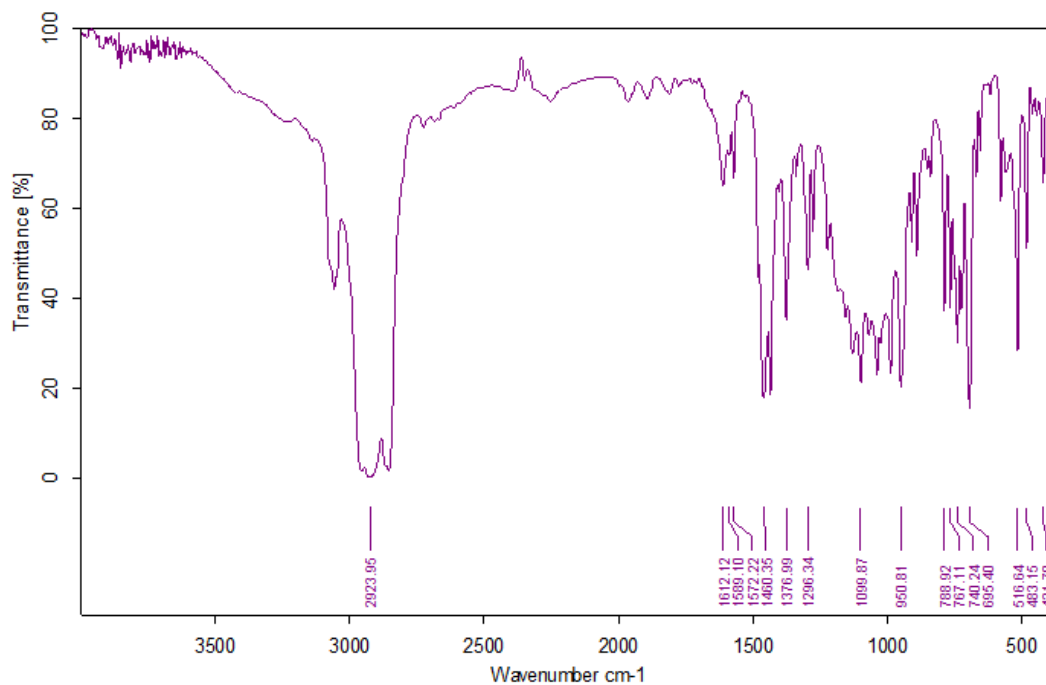

**Figure S20.** IR of 6

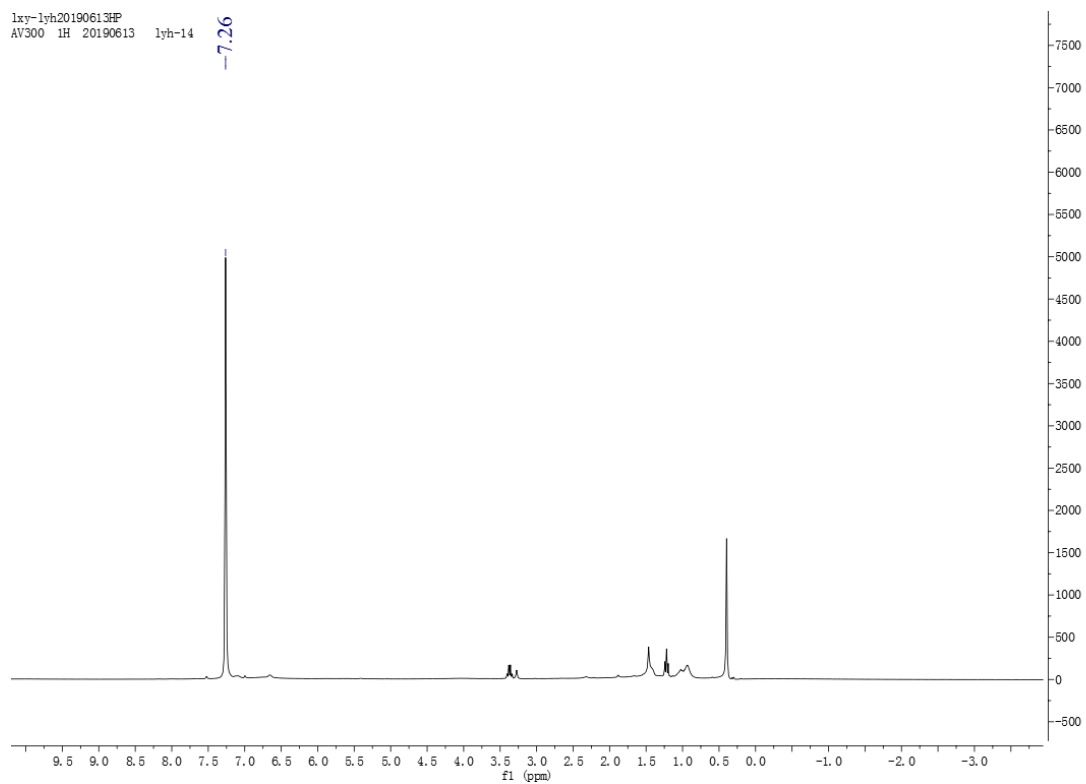

**Figure S21.**  $^1\text{H}$  NMR of **6** in  $\text{C}_6\text{D}_6$

4.  $^1\text{H}$  and  $^{13}\text{C}$  NMR spectra of the catalytic products

**Diphenyl(1-phenylethyl)silane (2a)**

$^1\text{H}$  NMR (300 MHz,  $\text{CDCl}_3$ ):  $\delta$  (ppm) 7.53 - 7.50 (m, 2H), 7.35-7.30 (m, 6H), 7.26-6.99 (m, 7H), 4.85 (d,  $J = 3.3$  Hz, 1H), 2.82 (qd,  $J = 7.5, 3.4$  Hz, 1H), 1.46 (d,  $J = 7.5$  Hz, 3H).  $^{13}\text{C}$  NMR (75 MHz,  $\text{CDCl}_3$ ):  $\delta$  (ppm) 144.46, 135.86, 135.71, 133.15, 129.87, 129.73, 128.32, 128.08, 128.0, 127.89, 127.86, 125.08, 27.11, 16.66.

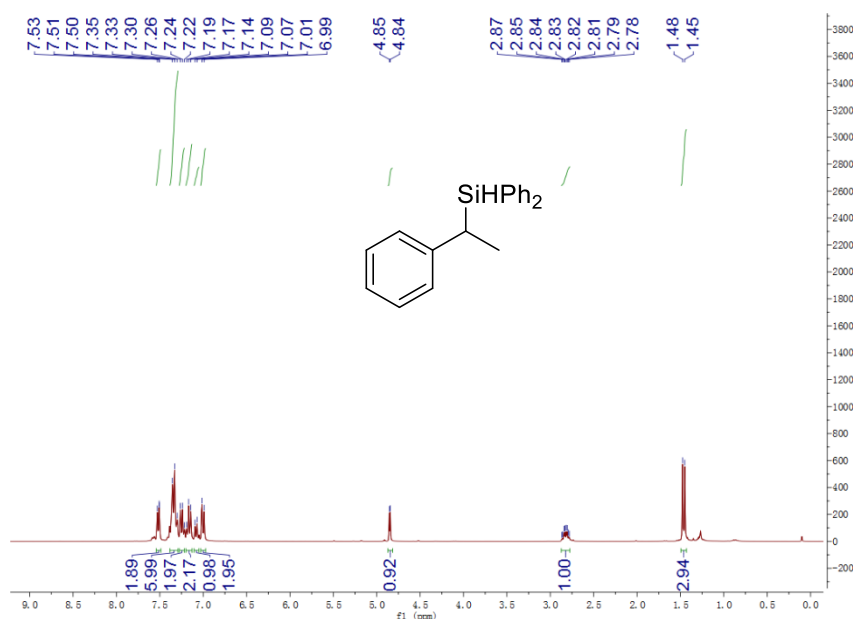

Figure S22.  $^1\text{H}$  NMR of 2a ( $\text{CDCl}_3$ )

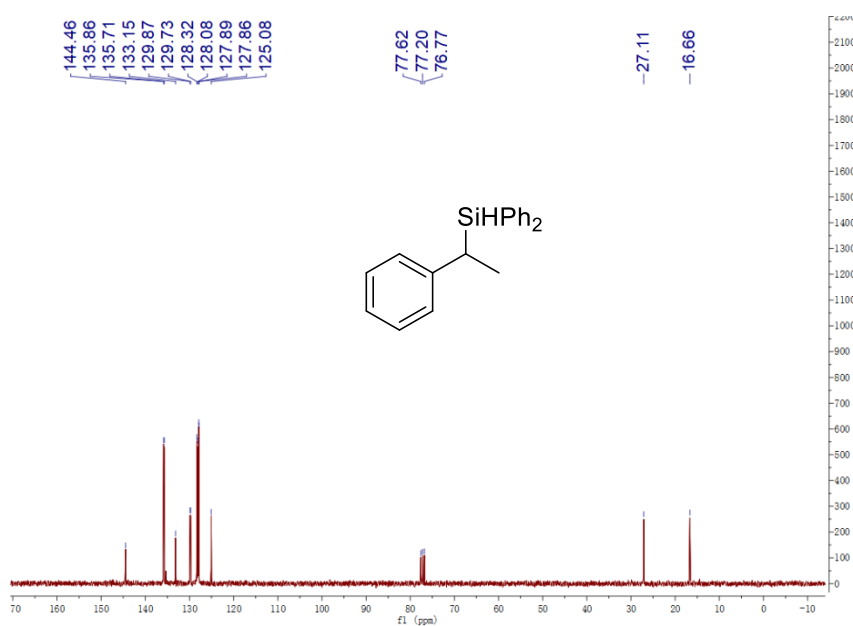

Figure S23.  $^{13}\text{C}$  NMR of 2a ( $\text{CDCl}_3$ )

### Diphenyl(1-(*p*-tolyl)ethyl)silane (**2b**)

$^1\text{H}$  NMR (300 MHz,  $\text{CDCl}_3$ ):  $\delta$  (ppm) 7.44-7.42 (m, 2H) 7.30-7.22 (m, 6H), 7.19-7.17 (m, 2H), 6.92-6.80 (m, 2H), 4.75 (d,  $J = 3.3$  Hz, 1H), 2.70 (qd,  $J = 7.5, 3.5$  Hz, 1H), 2.19 (s, 3H), 1.35 (d,  $J = 7.5$  Hz, 3H).  $^{13}\text{C}$  NMR (75 MHz,  $\text{CDCl}_3$ ):  $\delta$  (ppm) 141.29, 135.83, 135.68, 134.34, 133.31, 129.76, 129.63, 129.0, 127.99, 127.82, 127.69, 26.46, 21.07, 16.82.

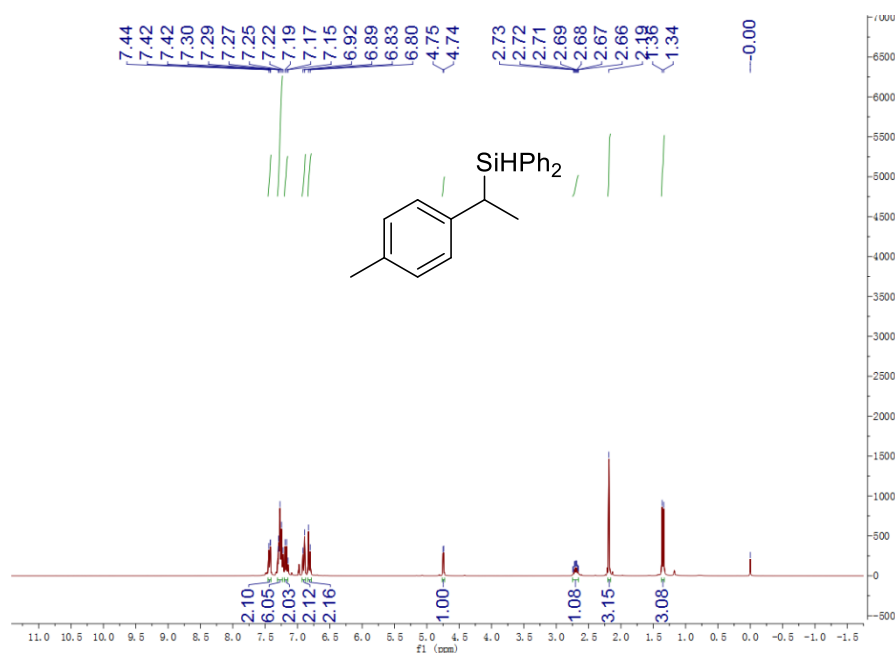

Figure S24.  $^1\text{H}$  NMR of **2b** ( $\text{CDCl}_3$ )

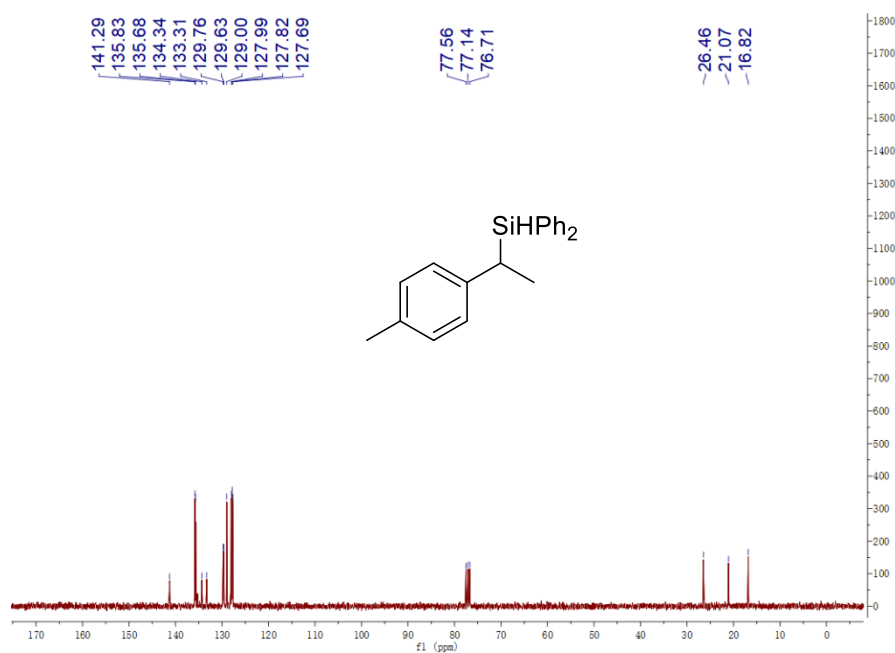

Figure S25.  $^{13}\text{C}$  NMR of **2b** ( $\text{CDCl}_3$ )



### Diphenyl(1-(*o*-tolyl)ethyl)silane (2c)

$^1\text{H}$  NMR (300 MHz,  $\text{CDCl}_3$ )  $\delta$  (ppm) 7.47–7.44 (m, 2H), 7.31–7.15 (m, 9H), 6.96–6.92 (m, 3H), 4.72 (d,  $J = 3.3$  Hz, 1H), 2.92 (qd,  $J = 7.4, 3.4$  Hz, 1H), 1.99 (s, 3H), 1.36 (d,  $J = 7.4$  Hz, 3H).  $^{13}\text{C}$  NMR (75 MHz,  $\text{CDCl}_3$ )  $\delta$  (ppm) 142.87, 135.86, 135.33, 133.37, 132.84, 130.10, 129.81, 129.57, 127.97, 127.73, 126.80, 126.08, 124.77, 22.03, 20.15, 16.61.

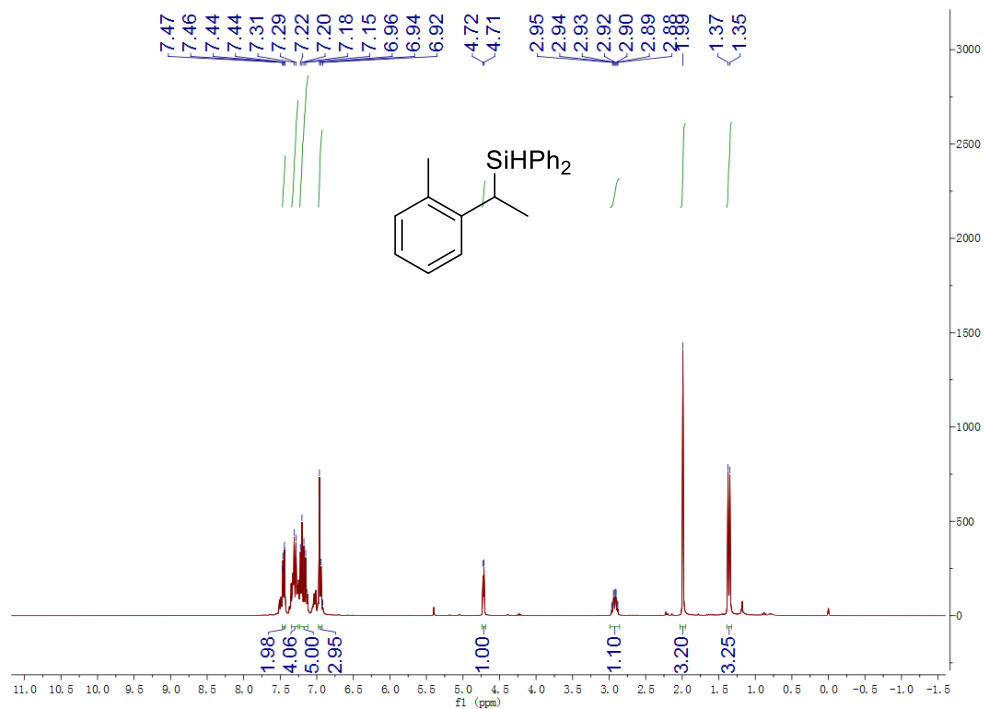

Figure S26.  $^1\text{H}$  NMR of 2c ( $\text{CDCl}_3$ )

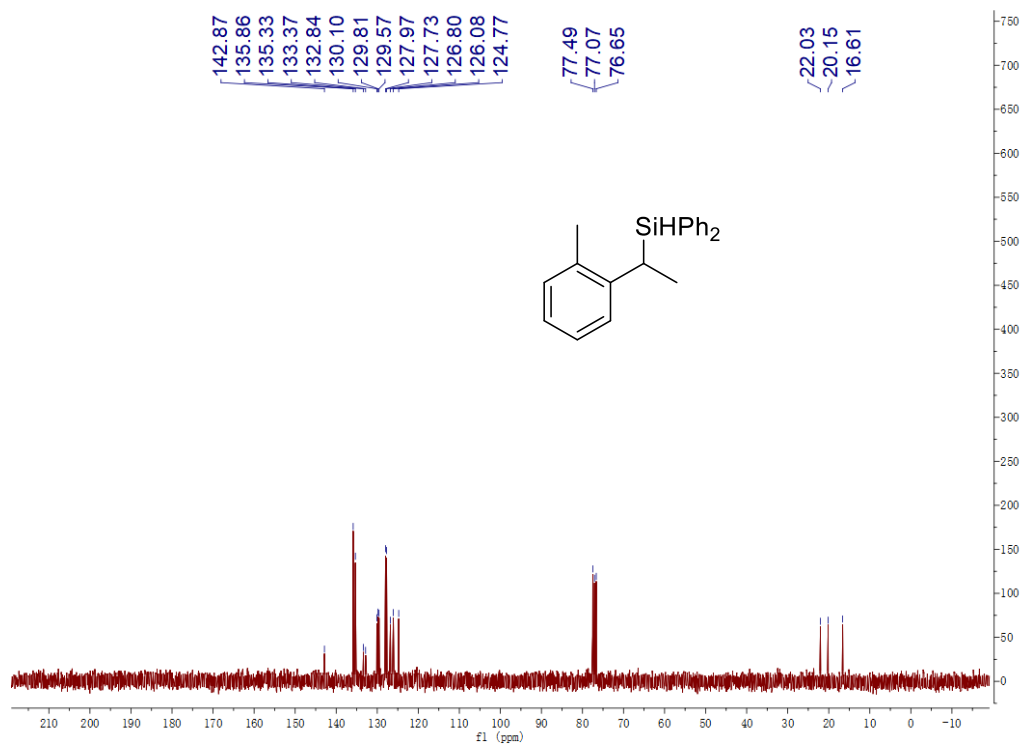

Figure S27.  $^{13}\text{C}$  NMR of 2c ( $\text{CDCl}_3$ )

## Diphenyl(1-(*m*-tolyl)ethyl)silane (**2d**)

$^1\text{H}$  NMR (300 MHz,  $\text{CDCl}_3$ ):  $\delta$  (ppm) 7.45-7.42 (m, 2H), 7.29-7.17 (m, 8H), 7.01-6.96 (m, 1H), 6.82-6.71 (m, 3H), 4.74 (d,  $J = 3.3$  Hz, 1H), 2.74-2.65 (m, 1H), 2.13 (s, 3H), 1.36 (d,  $J = 7.5$  Hz, 3H).  $^{13}\text{C}$  NMR (75 MHz,  $\text{CDCl}_3$ ):  $\delta$  (ppm) 144.24, 137.63, 135.81, 135.68, 133.21, 129.76, 129.63, 128.73, 128.13, 127.95, 127.75, 125.75, 124.79, 26.89, 21.49, 16.56.

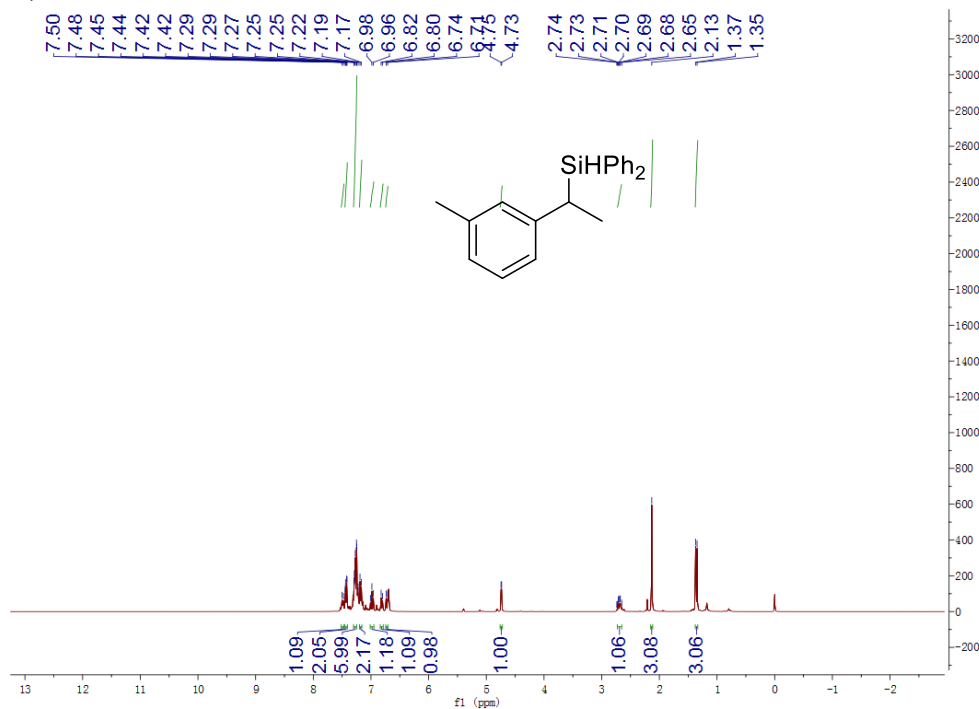

Figure S28.  $^1\text{H}$  NMR of **2d** ( $\text{CDCl}_3$ )

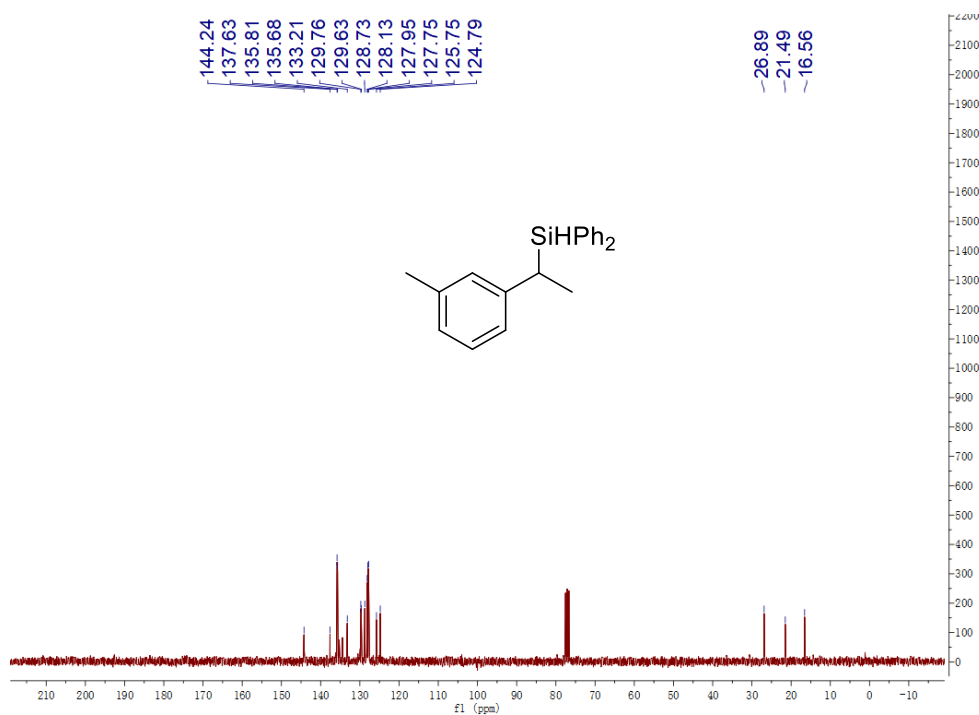

Figure S29.  $^{13}\text{C}$  NMR of **2d** ( $\text{CDCl}_3$ )

### (1-(4-(tert-butyl)phenyl)ethyl)diphenylsilane (2e)

$^1\text{H}$  NMR (300 MHz,  $\text{CDCl}_3$ ):  $\delta$  (ppm) 7.42-7.39 (m, 2H), 7.26-7.17 (m, 6H), 7.13-7.08 (m, 4H), 6.84 (d,  $J = 8.3$  Hz, 2H), 4.74 (d,  $J = 3.4$  Hz, 1H), 2.69 (qd,  $J = 7.4, 3.4$  Hz, 1H), 1.35 (d,  $J = 7.5$  Hz, 3H), 1.18 (s, 9H).  $^{13}\text{C}$  NMR (75 MHz,  $\text{CDCl}_3$ ):  $\delta$  (ppm) 147.88, 141.31, 135.96, 135.80, 133.45, 133.41, 129.87, 129.71, 128.11, 127.88, 127.54, 125.25, 34.48, 31.70, 26.48, 16.76.

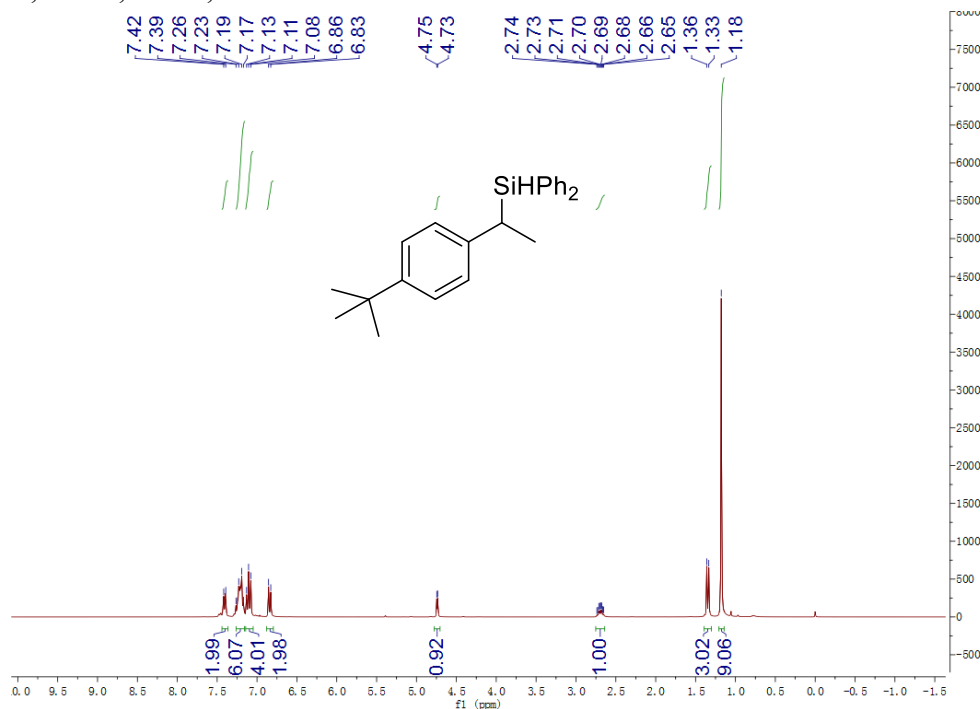

Figure S30.  $^1\text{H}$  NMR of 2e ( $\text{CDCl}_3$ )

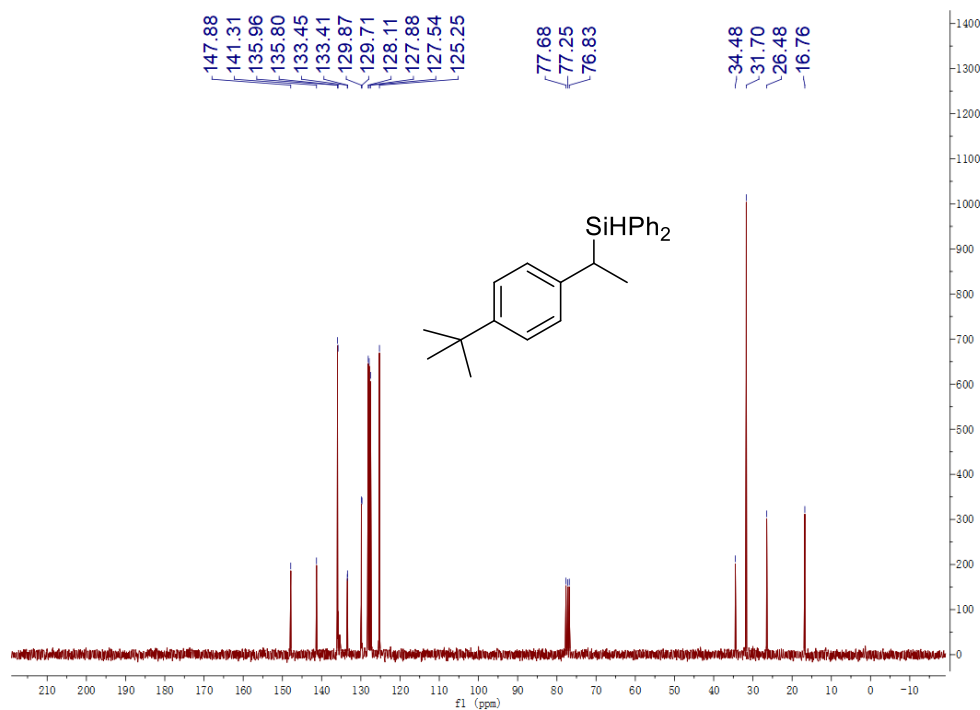

Figure S31.  $^{13}\text{C}$  NMR of 2e ( $\text{CDCl}_3$ )

### (1-(4-methoxyphenyl)ethyl)diphenylsilane (2f)

$^1\text{H}$  NMR (300 MHz,  $\text{CDCl}_3$ ):  $\delta$  (ppm) 7.65-7.63 (m, 2H), 7.50-7.45 (m, 6H), 7.40-7.37 (m, 2H), 7.05 (d,  $J = 8.7$  Hz, 2H), 6.89 (d,  $J = 8.7$  Hz, 2H), 4.96 (d,  $J = 3.3$  Hz, 1H), 3.85 (s, 3H), 2.89 (qd,  $J = 7.4, 3.3$  Hz, 1H), 1.56 (d,  $J = 7.6$  Hz, 3H).  $^{13}\text{C}$  NMR (75 MHz,  $\text{CDCl}_3$ ):  $\delta$  (ppm) 157.23, 136.35, 135.80, 135.68, 133.32, 133.26, 129.75, 129.62, 128.64, 128.00, 127.82, 113.74, 55.24, 25.91, 16.95.

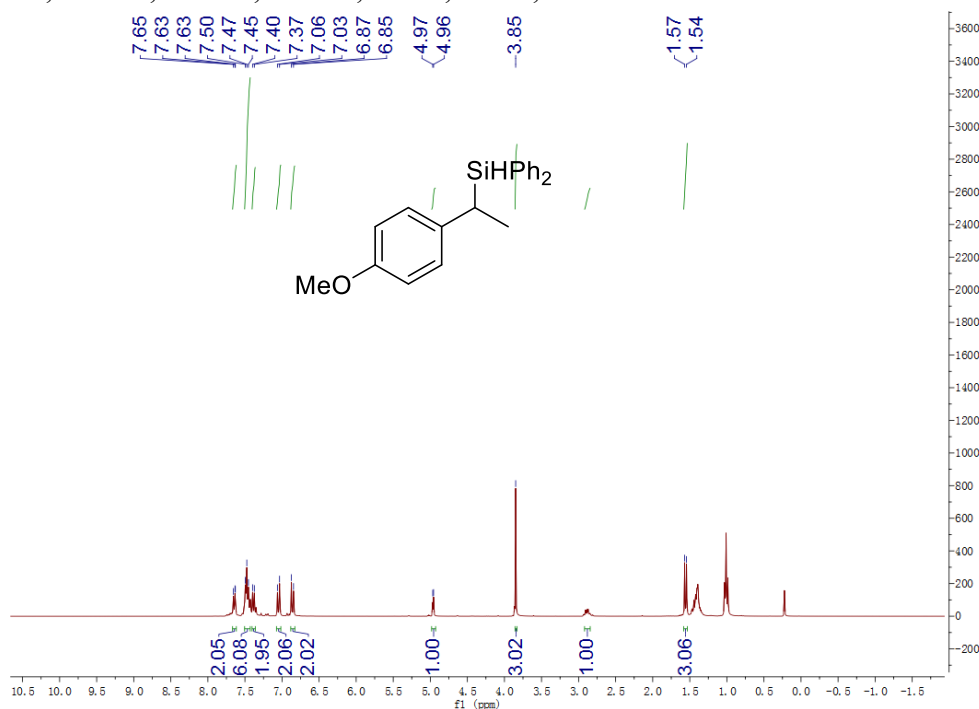

Figure S32.  $^1\text{H}$  NMR of 2f ( $\text{CDCl}_3$ )

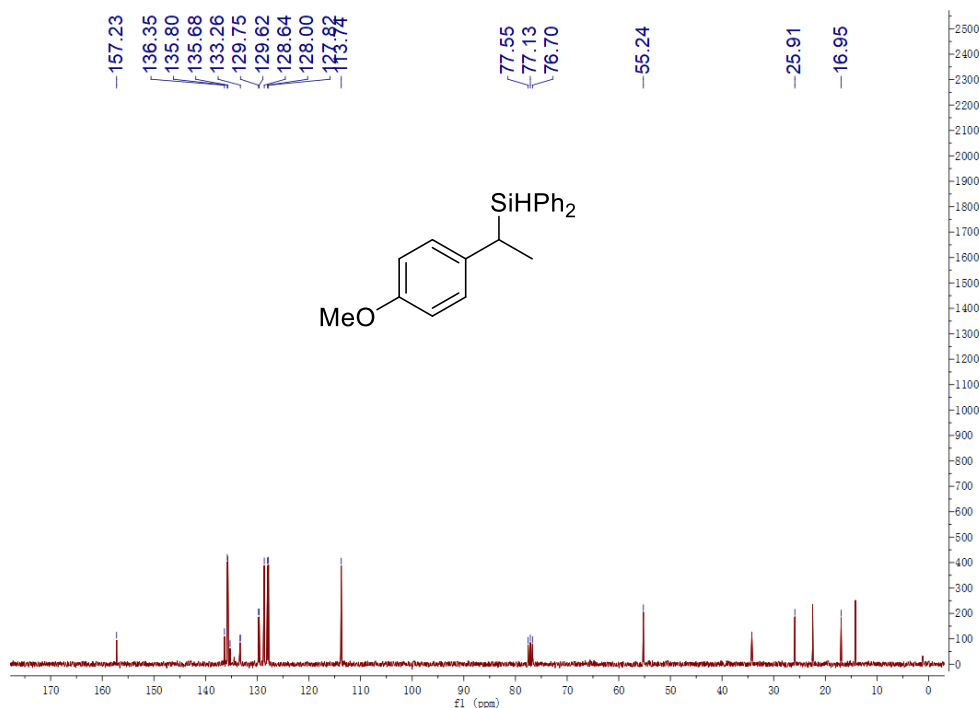

Figure S33.  $^{13}\text{C}$  NMR of 2f ( $\text{CDCl}_3$ )

**(1-([1,1'-biphenyl]-4-yl)ethyl)diphenylsilane (2g)**

$^1\text{H}$  NMR (300 MHz,  $\text{CDCl}_3$ ):  $\delta$  (ppm) 7.49-7.43 (m, 4H), 7.35-7.17 (m, 13H), 6.97 (d,  $J = 8.2$  Hz, 2H), 4.78 (d,  $J = 3.2$  Hz, 1H), 2.78 (qd,  $J = 7.4, 3.3$  Hz, 1H), 1.40 (d,  $J = 7.5$  Hz, 3H).  $^{13}\text{C}$  NMR (75 MHz,  $\text{CDCl}_3$ ):  $\delta$  (ppm) 143.66, 141.15, 137.77, 135.84, 135.70, 133.03, 129.86, 129.74, 128.80, 128.19, 128.05, 127.87, 126.98, 126.95, 126.90, 26.79, 16.56.

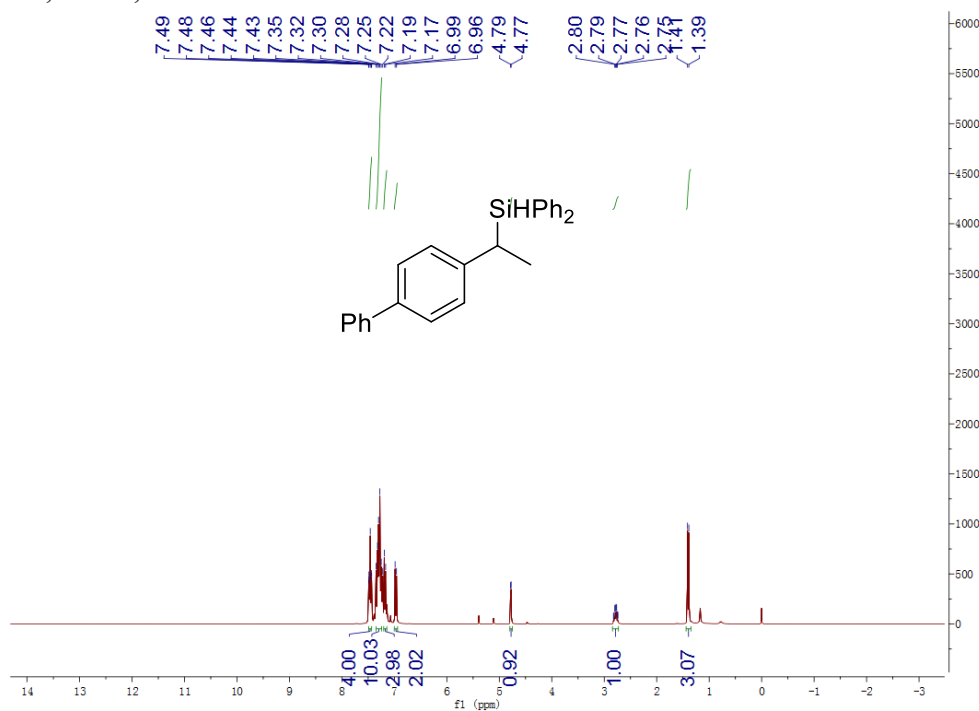

**Figure S34.**  $^1\text{H}$  NMR of 2g ( $\text{CDCl}_3$ )

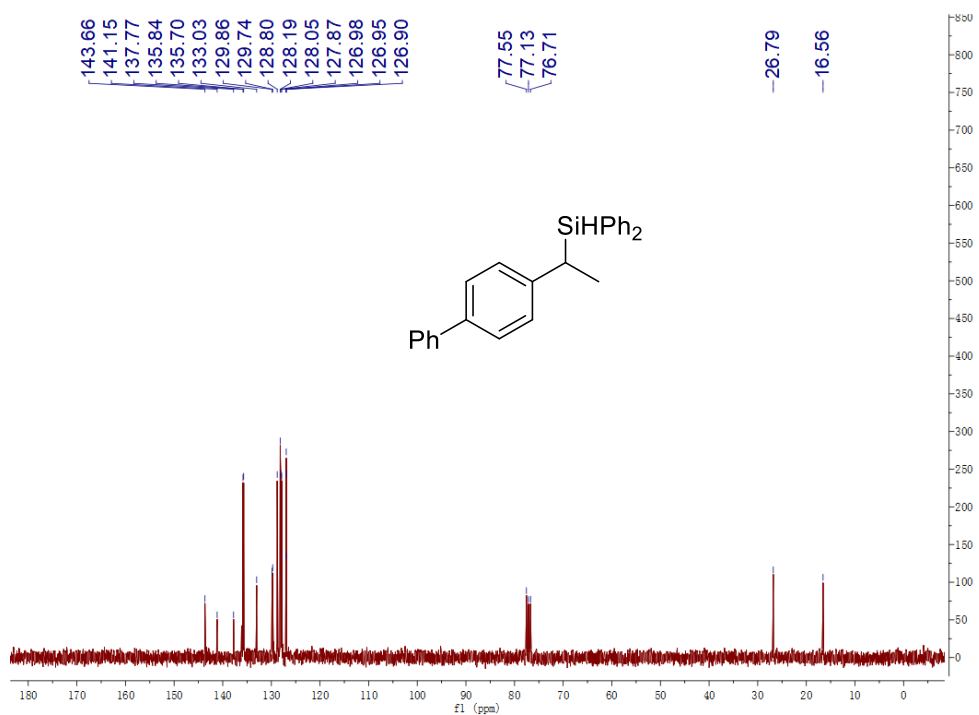

**Figure S35.**  $^{13}\text{C}$  NMR of 2g ( $\text{CDCl}_3$ )

### (1-(3-chlorophenyl)ethyl)diphenylsilane (2h+2h')

$^1\text{H}$  NMR (300 MHz,  $\text{CDCl}_3$ ):  $\delta$  (ppm) 7.49-7.46 (m, 4H), 7.44-7.41 (m, 2H), 7.30-7.25 (m, 12H), 7.21-7.19 (m, 2H), 7.07-7.05 (m, 3H), 6.87-6.77 (m, 2H), 4.80 (t,  $J = 3.7$  Hz, 1H), 4.73 (d,  $J = 3.7$  Hz, 1H), 2.75-2.69 (m, 1H), 2.66-2.61 (m, 1H), 1.43-1.37 (m, 2H), 1.35 (d,  $J = 7.4$  Hz, 3H);  $^{13}\text{C}$  NMR: (75 MHz,  $\text{CDCl}_3$ ):  $\delta$  (ppm) 146.65, 146.38, 135.88, 135.71, 135.56, 135.19, 133.84, 129.97, 129.82, 129.63, 129.33, 128.17, 128.08, 127.90, 127.74, 126.14, 125.96, 125.09, 30.26, 27.05, 16.27, 14.16.

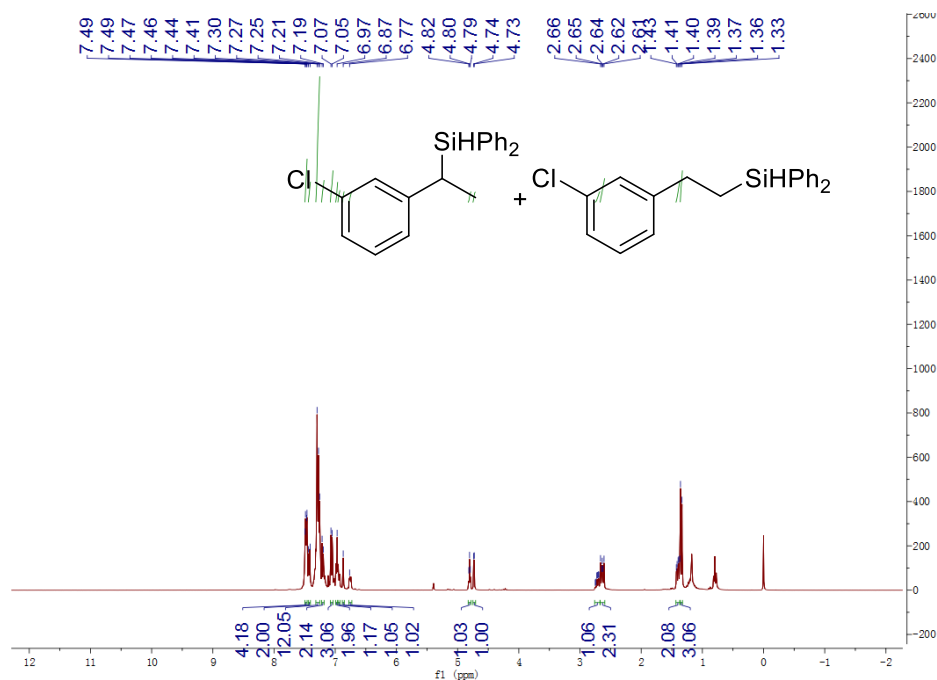

Figure S36.  $^1\text{H}$  NMR of 2h+2h' ( $\text{CDCl}_3$ )

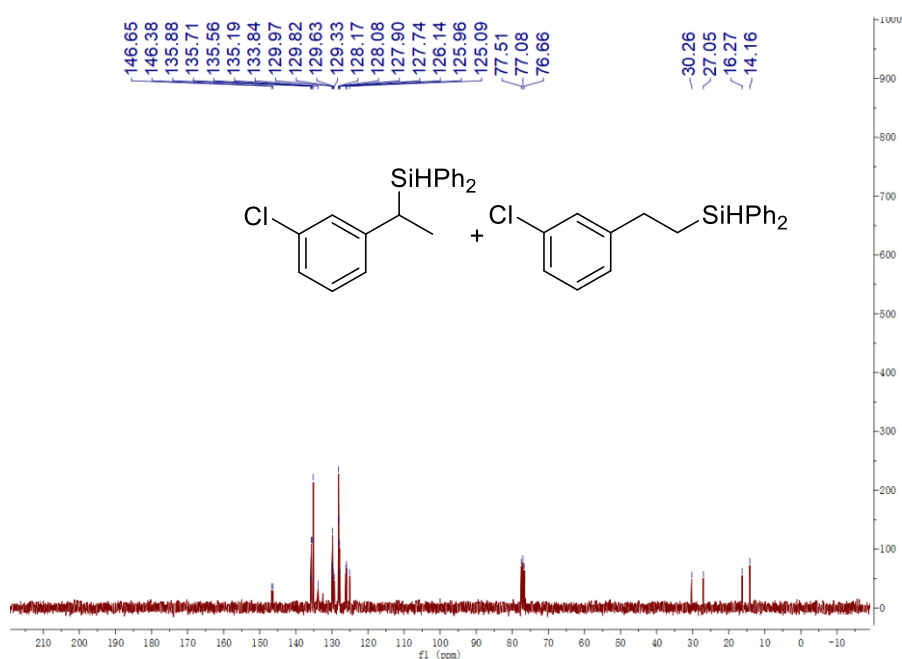

Figure S37.  $^{13}\text{C}$  NMR of 2h+2h' ( $\text{CDCl}_3$ )

### (1-(naphthalen-2-yl)ethyl)diphenylsilane (2i)

$^1\text{H}$  NMR (300 MHz,  $\text{CDCl}_3$ ):  $\delta$  (ppm) 7.65-7.62 (m, 1H), 7.54-7.51 (m, 2H), 7.43-7.41 (m, 2H), 7.28-7.24 (m, 9H), 7.14-7.12 (m, 2H), 7.05-7.02 (m, 1H), 4.81 (d,  $J = 3.1$  Hz, 1H), 2.93-2.84 (m, 1H), 1.44 (d,  $J = 7.5$  Hz, 3H).  $^{13}\text{C}$  NMR (75 MHz,  $\text{CDCl}_3$ ):  $\delta$  (ppm) 142.18, 135.87, 135.72, 133.81, 133.05, 133.02, 131.67, 129.89, 129.78, 128.07, 127.91, 127.68, 127.63, 127.47, 127.39, 125.88, 125.40, 124.89, 27.34, 16.71.

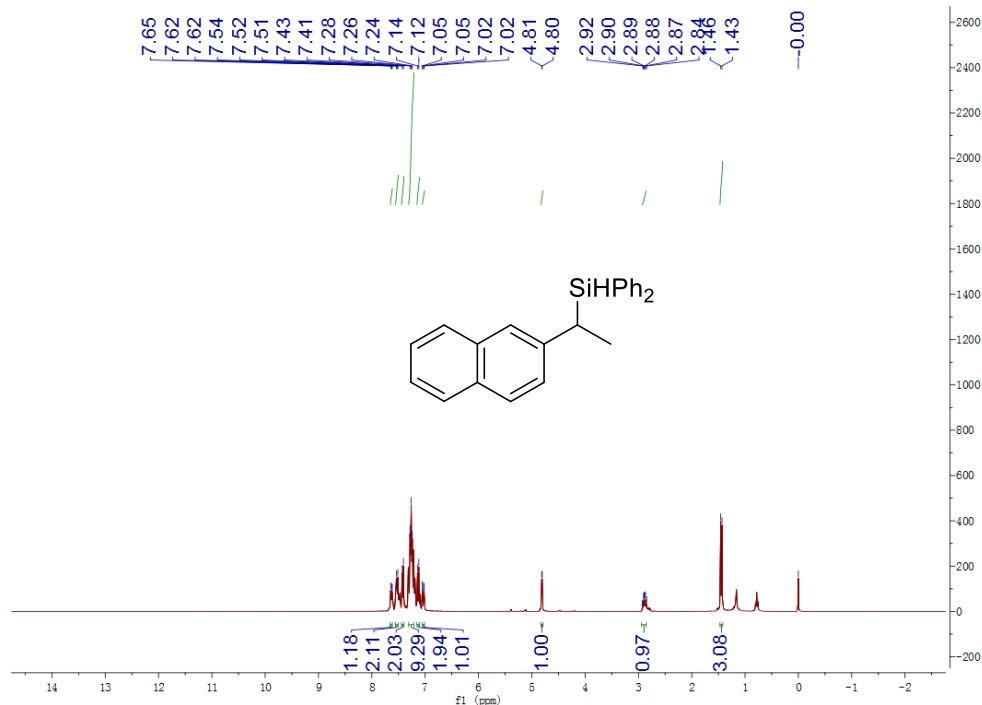

Figure S38.  $^1\text{H}$  NMR of 2i ( $\text{CDCl}_3$ )

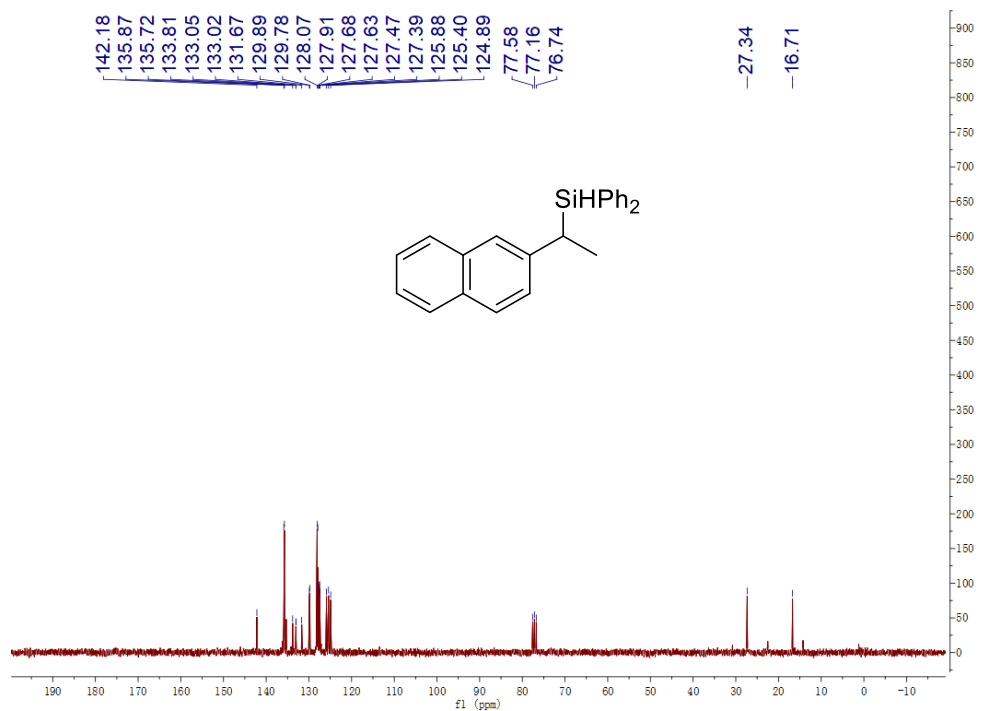

Figure S39.  $^{13}\text{C}$  NMR of 2i ( $\text{CDCl}_3$ )

(1-(4-fluorophenyl)ethyl)diphenylsilane (2k)

$^1\text{H}$  NMR (300 MHz,  $\text{CDCl}_3$ ):  $\delta$  (ppm) 7.63–7.61 (m, 2H), 7.47–7.45 (m, 6H), 7.39–7.37 (m, 2H), 7.03–6.96 (m, 4H), 4.93 (d,  $J = 2.6$  Hz, 1H), 2.95–2.87 (m, 1H), 1.54 (d,  $J = 7.4$  Hz, 3H).  $^{13}\text{C}$  NMR (75 MHz,  $\text{CDCl}_3$ ):  $\delta$  (ppm) 162.35, 139.99, 135.74, 135.60, 132.84, 129.90, 129.77, 128.97, 128.87, 128.17, 128.07, 127.89, 115.10, 114.82, 26.27, 16.76.

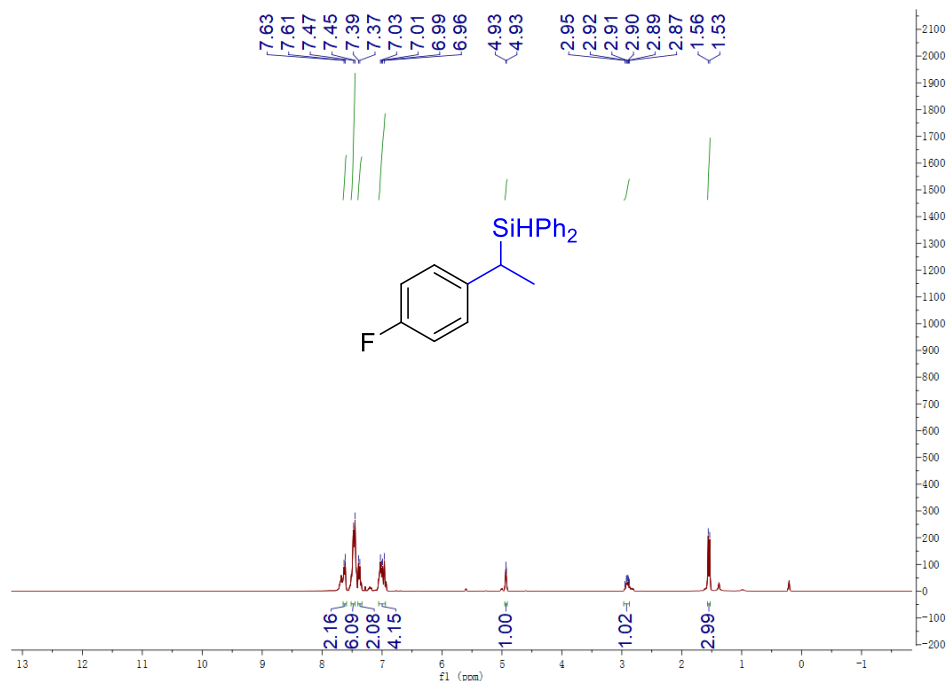

**Figure S40.**  $^1\text{H}$  NMR of **2k** ( $\text{CDCl}_3$ )

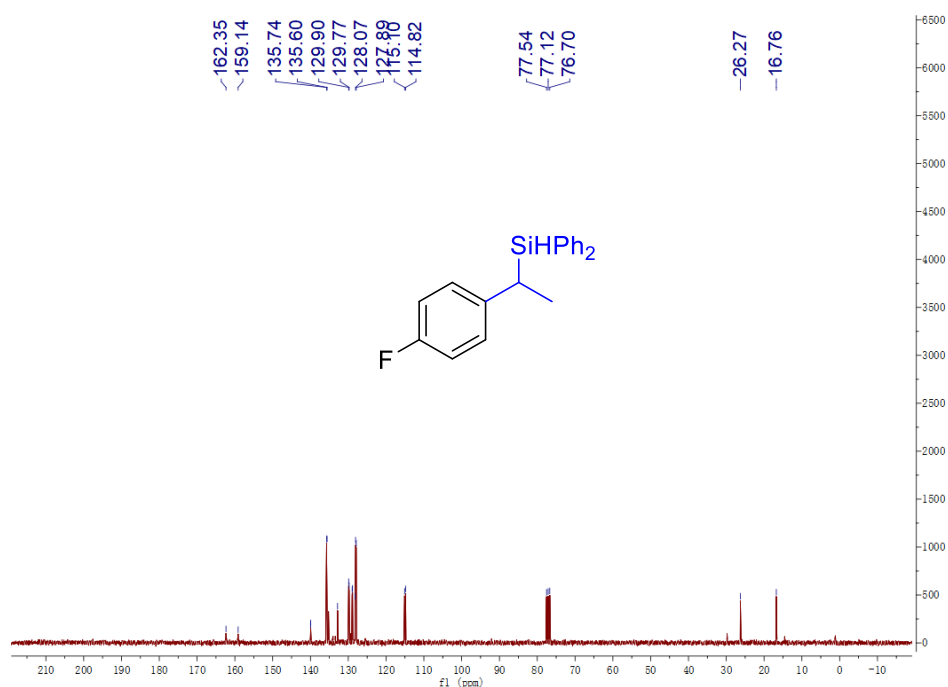

**Figure S41.**  $^{13}\text{C}$  NMR of **2k** ( $\text{CDCl}_3$ )



**(*n*-octyl)diphenylsilane (2l)**

$^1\text{H}$  NMR (300 MHz,  $\text{CDCl}_3$ ):  $\delta$  (ppm) 7.50-7.47 (m, 4H), 7.30-7.28 (m, 6H), 4.77 (t,  $J = 3.7$  Hz, 1H), 1.41-1.33 (m, 4H), 1.18-1.10 (m, 8H), 1.09-1.03 (m, 2H), 0.81-0.77 (m, 3H).  $^{13}\text{C}$  NMR (75 MHz,  $\text{CDCl}_3$ ):  $\delta$  (ppm) 134.10, 133.69, 128.42, 126.90, 32.16, 30.85, 28.69, 28.18, 23.36, 21.64, 13.08, 11.10.

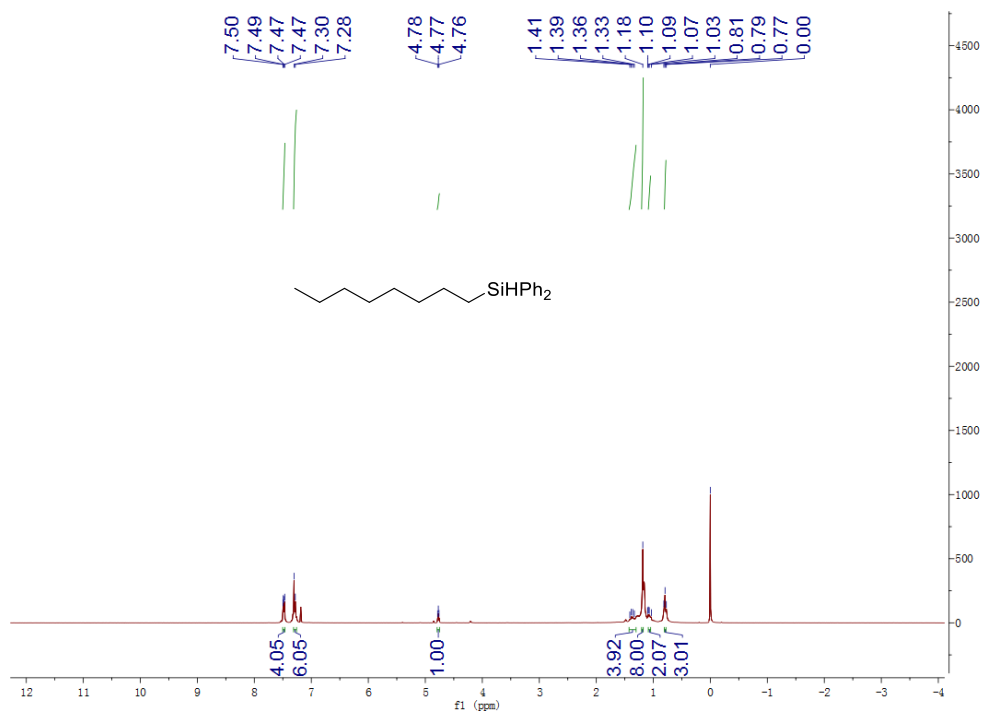

**Figure S42.**  $^1\text{H}$  NMR of **2l** ( $\text{CDCl}_3$ )

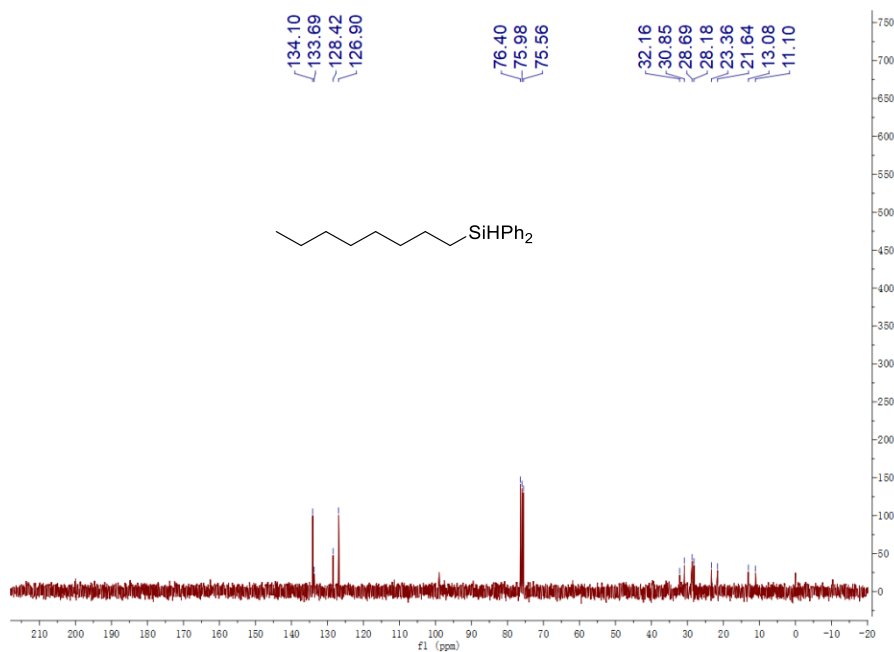

**Figure S43.**  $^{13}\text{C}$  NMR of **2l** ( $\text{CDCl}_3$ )

**(*n*-heptyl)diphenylsilane (2m)**

$^1\text{H}$  NMR (300 MHz,  $\text{CDCl}_3$ ):  $\delta$  (ppm) 7.59-7.54 (m, 4H), 7.40-7.33 (m, 6H), 4.87 (t,  $J = 3.0$  Hz, 1H), 1.54-1.46 (m, 4H), 1.28-1.25 (m, 6H), 1.18-1.13 (m, 2H), 0.88 (t,  $J = 6.0$  Hz, 3H).  $^{13}\text{C}$  NMR (75 MHz,  $\text{CDCl}_3$ ):  $\delta$  (ppm) 135.38, 134.83, 129.54, 128.03, 33.27, 31.94, 29.35, 24.53, 22.75, 14.25, 12.09.

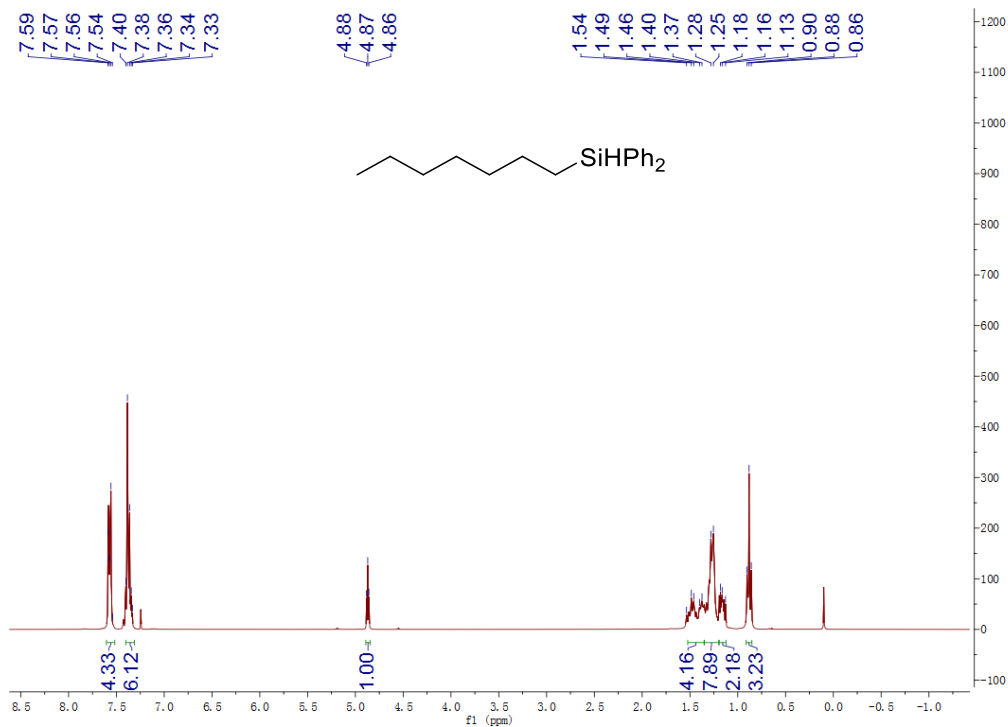

**Figure S44.**  $^1\text{H}$  NMR of **2m** ( $\text{CDCl}_3$ )

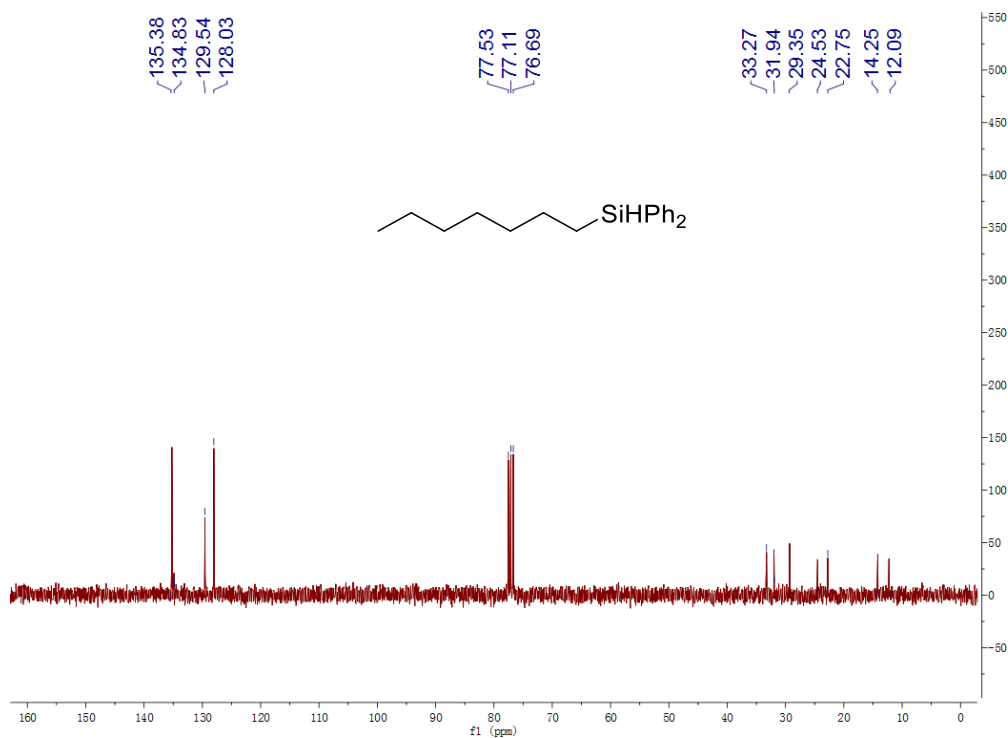

**Figure S45.**  $^{13}\text{C}$  NMR of **2m** ( $\text{CDCl}_3$ )

**(2-cyclohexylethyl)diphenylsilane (2n)**

$^1\text{H}$  NMR (300 MHz,  $\text{CDCl}_3$ ):  $\delta$  (ppm) 7.44-7.41 (m, 4H), 7.29-7.22 (m, 6H), 5.15 (s, 1H), 1.61-1.51 (m, 2H), 1.34-1.22 (m, 6H), 1.22-0.97(m, 5H), 0.85-0.82 (m, 2H).  $^{13}\text{C}$  NMR (75 MHz,  $\text{CDCl}_3$ ):  $\delta$  (ppm) 135.04, 129.60, 128.08, 126.76, 36.51, 31.62, 31.29, 28.55, 25.34, 9.30.

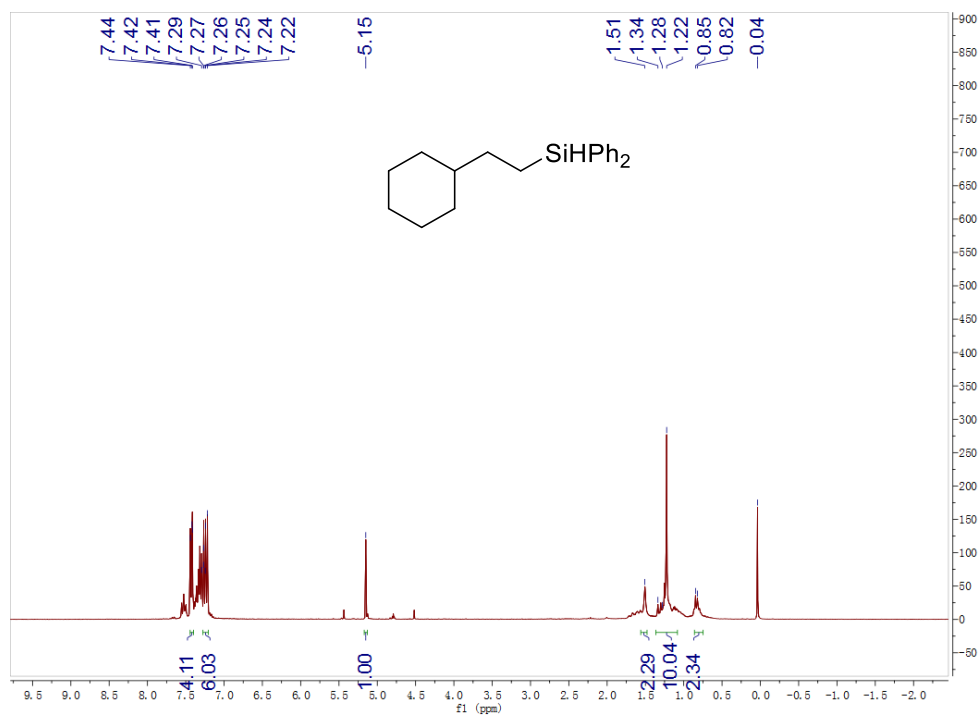

**Figure S46.  $^1\text{H}$  NMR of 2n ( $\text{CDCl}_3$ )**

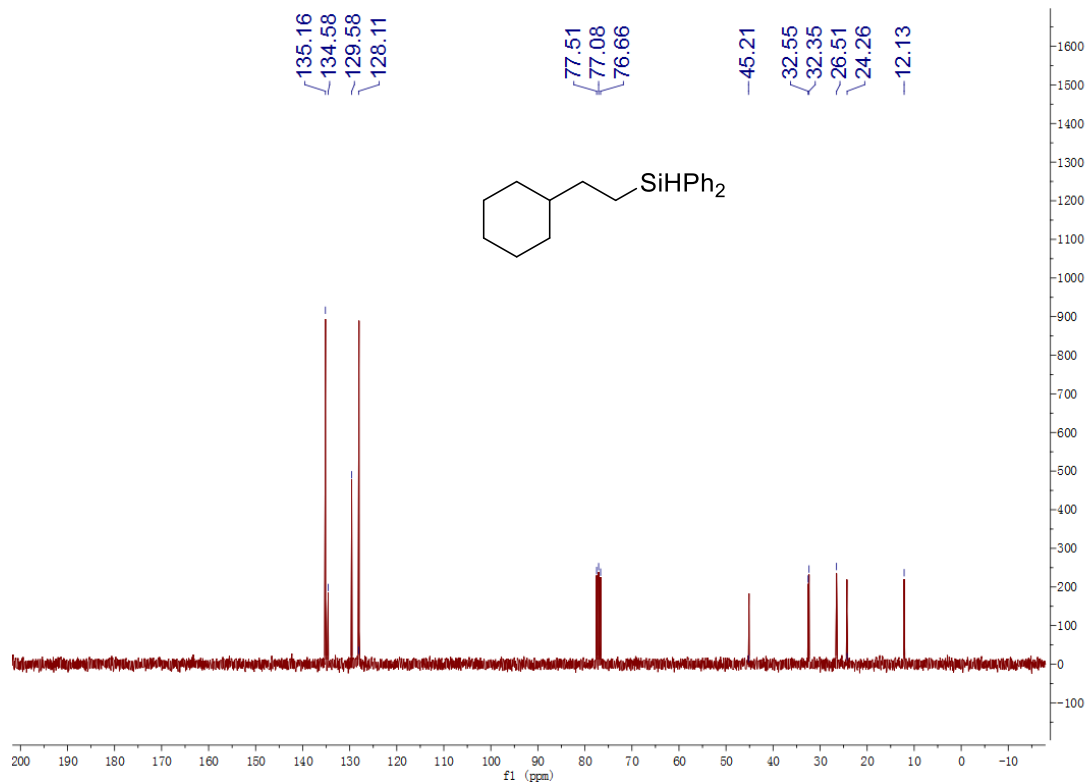

**Figure S47.**  $^{13}\text{C}$  NMR of **2n** ( $\text{CDCl}_3$ )

**(2-(cyclohex-3-en-1-yl)ethyl)diphenylsilane (2o)**

$^1\text{H}$  NMR (300 MHz,  $\text{CDCl}_3$ ):  $\delta$  (ppm) 7.48-7.44 (m, 4H), 7.27-7.24 (m, 6H), 5.54-5.53 (m, 2H), 4.78 (t,  $J = 3.0$  Hz, 1H), 2.00-2.00 (m, 1H), 1.99-1.91 (m, 2H), 1.69-1.68 (m, 1H), 1.65-1.63 (m, 1H), 1.54-1.49 (m, 1H), 1.88-1.34 (m, 2H), 1.10-1.05 (m, 3H).  $^{13}\text{C}$  NMR (75 MHz,  $\text{CDCl}_3$ ):  $\delta$  (ppm) 135.38, 134.69, 129.59, 128.15, 127.04, 126.65, 36.35, 31.66, 31.10, 28.54, 25.12, 9.19.

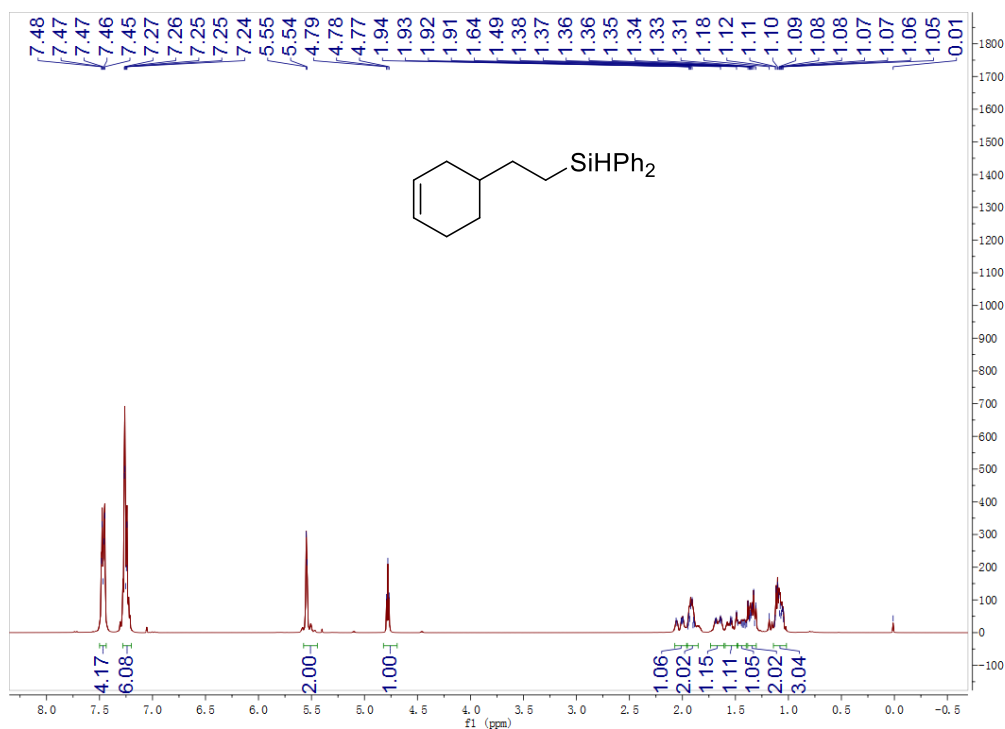

**Figure S48.**  $^1\text{H}$  NMR of **2o** ( $\text{CDCl}_3$ )

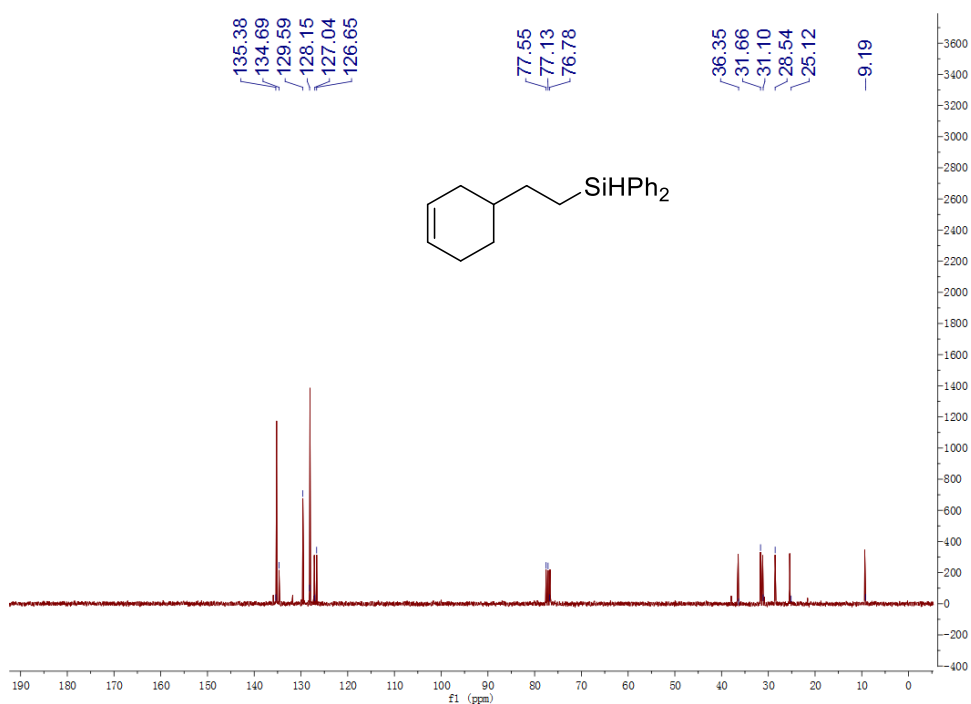

Figure S49.  $^{13}\text{C}$  NMR of **2o** ( $\text{CDCl}_3$ )

**Diphenyl(4-phenylbutyl)silane (2p)**

$^1\text{H}$  NMR (300 MHz,  $\text{CDCl}_3$ ):  $\delta$  (ppm) 7.54-7.52 (m, 4H), 7.36-7.29 (m, 6H), 7.25-7.20 (m, 2H), 7.15-7.09 (m, 3H), 4.86 (t,  $J = 3.0$  Hz, 1H), 3.11 (t,  $J = 9.0$  Hz, 2H), 1.73-1.63 (m, 2H), 1.56-1.46 (m, 2H), 1.19-1.13 (m, 2H).  $^{13}\text{C}$  NMR (75 MHz,  $\text{CDCl}_3$ ):  $\delta$  (ppm) 142.72, 135.27, 134.66, 129.66, 128.51, 128.38, 128.12, 125.73, 35.58, 35.06, 24.17, 12.03.

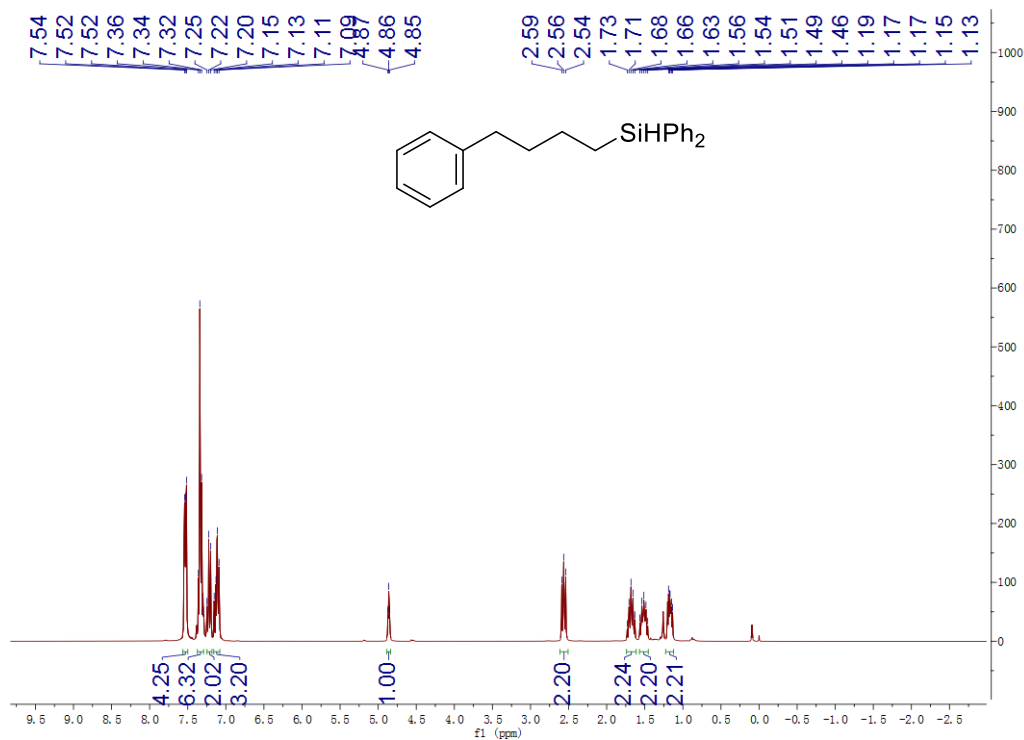

Figure S50.  $^1\text{H}$  NMR of **2p** ( $\text{CDCl}_3$ )

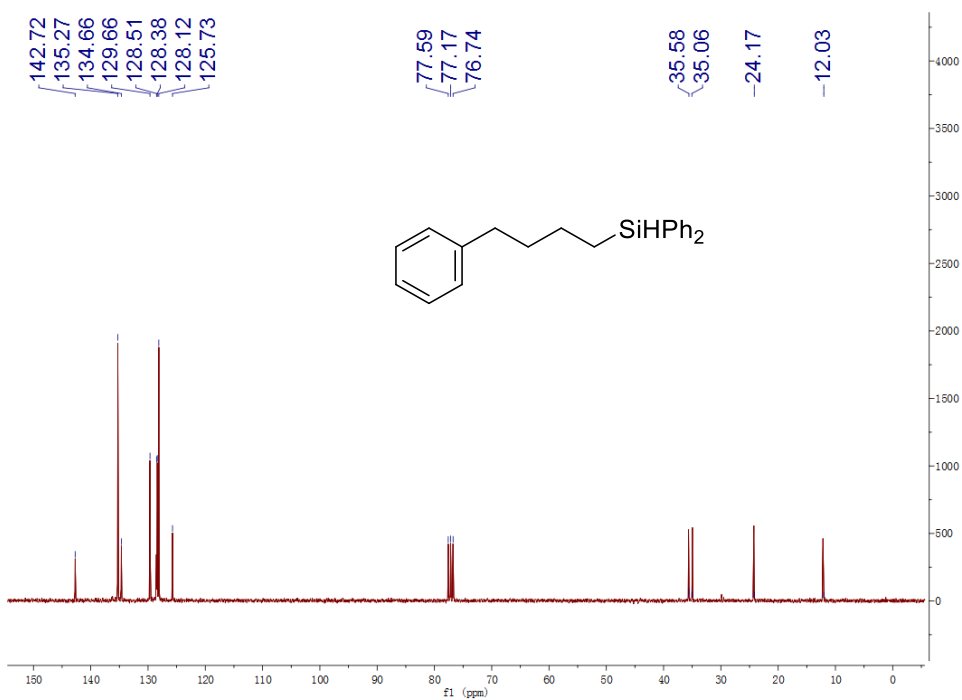

Figure S51.  $^{13}\text{C}$  NMR of **2p** ( $\text{CDCl}_3$ )

**(6-chlorohexyl)diphenylsilane(2q)**

$^1\text{H}$  NMR (300 MHz,  $\text{CDCl}_3$ ):  $\delta$  (ppm) 7.66-7.63 (m, 4H), 7.46-7.41 (m, 6H), 4.94 (t,  $J = 6.0$  Hz, 1H), 3.56 (t,  $J = 6.0$  Hz, 2H), 1.82-1.77(m, 2H), 1.56-1.48 (m, 6H), 1.30-1.23(m, 2H).  $^{13}\text{C}$  NMR (75 MHz,  $\text{CDCl}_3$ ):  $\delta$  (ppm) 135.18, 134.58, 129.72, 128.05, 45.21, 31.94, 26.60, 23.59, 11.65.

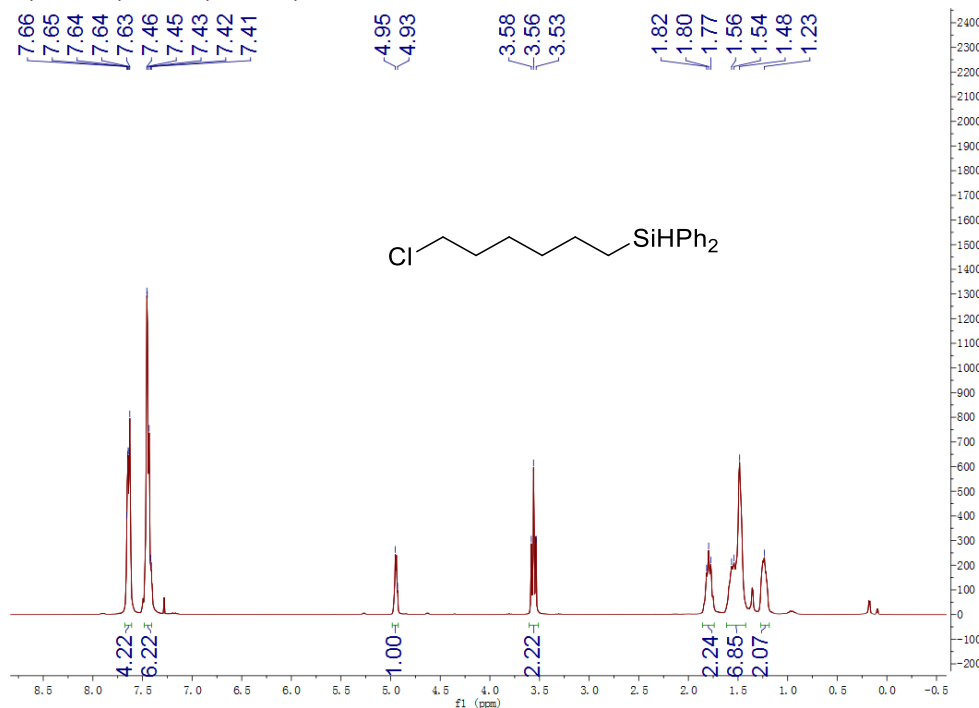

Figure S52.  $^1\text{H}$  NMR of **2q** ( $\text{CDCl}_3$ )

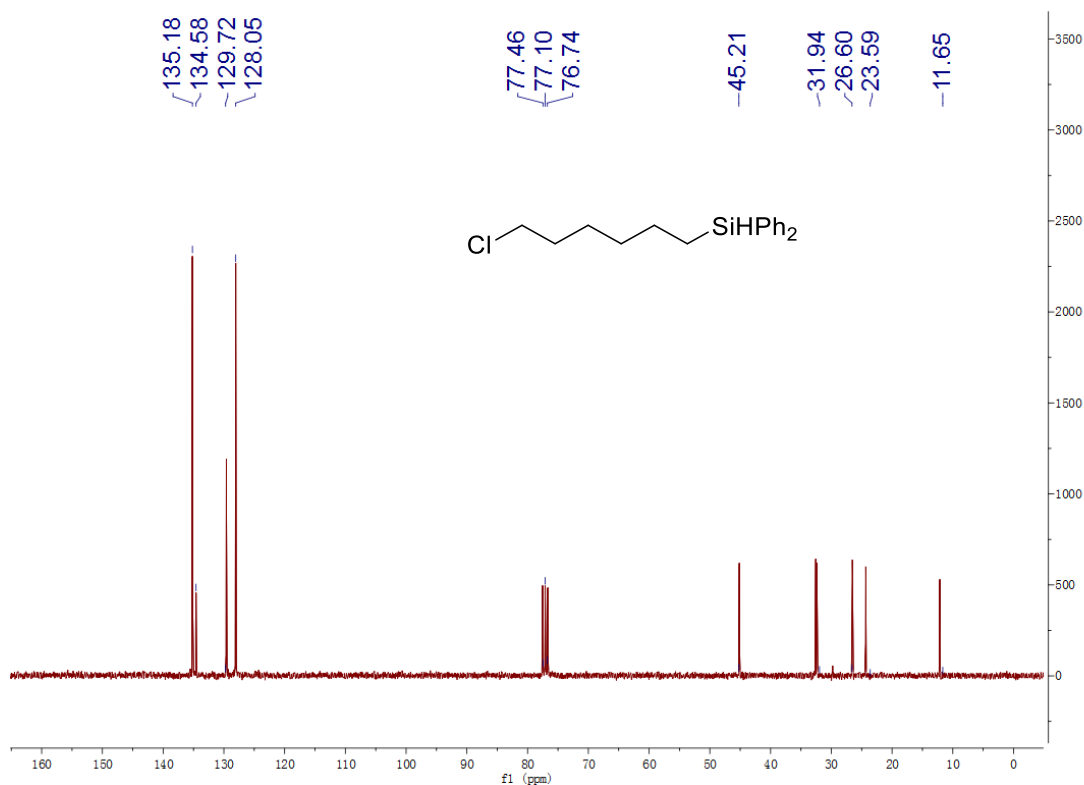

**Figure S53.**  $^{13}\text{C}$  NMR of **2q** ( $\text{CDCl}_3$ )
